# Supplementary material for: Characterization and prediction of clinical pathways of vulnerability to psychosis through graph signal processing
Source: eLife. 2021 Sep 27;10:e59811. doi: 10.7554/eLife.59811 (PMC8476129; doi:10.7554/eLife.59811)
Supplement: Source data 1. [file elife-59811-data1.xlsx]

## Sheet: Adjecency Matrix in 22q11DS
	'SIPS P1 UNUSUAL THOUGHT'	'SIPS P2 PERSECUTORY IDEAS'	'SIPS P4 PERCEPTUAL ABNORMALITIES'	'SIPS P5 DISORGANIZED COMMUNICATION'	'SIPS N1 SOCIAL ANHEDONIA'	'SIPS N2 AVOLITION'	'SIPS N3 EXPRESSION EMOTION'	'SIPS N4 EXPERIENCE EMOTION'	'SIPS N5 IDEATIONAL RICHNESS'	'SIPS N6 OCCUPATIONAL FUNCTIONING'	'SIPS D1 ODD BEHAVIOUR'	'SIPS D2 BIZARRE THINKING'	'SIPS D3 TROUBLE ATTENTION'	'SIPS D4 PERSONAL HYGIENE'	'SIPS G1 SLEEP DISTURBANCES'	'SIPS G2 DYSPHORIC MOOD'	'SIPS G3 MOTOR DISTURBANCES'	'SIPS G4 IMPAIRED TOLLERANCE TO STRESS'	'BPRS Anxiety'	'BPRS Bizarre Behaviour'	'BPRS Blunted Affect'	'BPRS Conceptual Disorganisation'	'BPRS Depression'	'BPRS Disorientation'	'BPRS Distractibility'	'BPRS Elevated Mood'	'BPRS Emotional Withdrawal'	'BPRS Excitement'	'BPRS Guilt'	'BPRS Hallucinations'	'BPRS Hostility'	'BPRS MAnnerisms'	'BPRS Motor Hyperactivity'	'BPRS Motor Retardation'	'BPRS Self neglect'	'BPRS Somatic'	'BPRS Suicidality'	'BPRS Suspiciouness'	'BPRS Tension'	'BPRS Uncooperativeness'	'BPRS Unsual Thought'	'SIPS P1 UNUSUAL THOUGHT T2'	'SIPS P2 PERSECUTORY IDEAS T2'	'SIPS P4 PERCEPTUAL ABNORMALITIES T2'	'SIPS P5 DISORGANIZED COMMUNICATION T2'	'SIPS N1 SOCIAL ANHEDONIA T2'	'SIPS N2 AVOLITION T2'	'SIPS N3 EXPRESSION EMOTION T2'	'SIPS N4 EXPERIENCE EMOTION T2'
'SIPS P1 UNUSUAL THOUGHT'	0	0.651371	0.630815	0.311136	0	0	0	0	0	0	0.412941	0.397518	0	0	0.568175	0.305901	0	0	0.531791	0.602177	0	0	0	0.387112	0.441907	0	0	0	0.388006	0.638767	0.455263	0.395518	0.346037	0	0	0	0	0.697708	0.551231	0.315803	0.757446	0	0.319268	0	0.373314	0	0	0	0
'SIPS P2 PERSECUTORY IDEAS'	0.651371	0	0.41205	0.444057	0	0	0	0.451188	0	0.317547	0.484617	0.405608	0	0	0	0	0	0	0.550196	0.378404	0	0	0	0	0.307998	0	0	0	0.413379	0.398712	0.394586	0.359119	0	0.34774	0.381532	0	0.344274	0.828746	0.452496	0.392	0.598908	0	0.384659	0	0.314552	0.313128	0	0	0
'SIPS P4 PERCEPTUAL ABNORMALITIES'	0.630815	0.41205	0	0.331602	0	0	0	0	0	0	0	0	0	0	0.501445	0	0	0	0.487494	0.503805	0	0	0	0	0.387626	0	0	0	0	0.891142	0.348241	0.330089	0	0	0	0	0	0.500574	0	0	0.581862	0	0.367511	0.347766	0.350519	0	0	0	0
'SIPS P5 DISORGANIZED COMMUNICATION'	0.311136	0.444057	0.331602	0	0.517827	0.403344	0.483788	0.448548	0.392134	0.503189	0.723139	0.54519	0	0.439136	0	0	0	0.401691	0.377268	0.653285	0.564246	0.419026	0	0.540586	0	0.374174	0.626851	0	0.440832	0.428082	0.570334	0.738303	0	0.684493	0.610445	0	0	0.521127	0	0.62602	0.634947	0.431679	0.333108	0.342545	0.585097	0.449529	0.327976	0.523027	0.430946
'SIPS N1 SOCIAL ANHEDONIA'	0	0	0	0.517827	0	0.548236	0.658011	0	0.462663	0.376087	0.597414	0.325188	0	0.605416	0	0	0	0	0.366708	0.354335	0.676883	0	0	0.514243	0	0	0.69739	0	0	0	0.352734	0.439727	0	0.592244	0.650991	0	0	0.405324	0	0.520185	0.446656	0	0	0	0	0.351056	0.369731	0.449323	0
'SIPS N2 AVOLITION'	0	0	0	0.403344	0.548236	0	0.541645	0.364562	0.393218	0.39629	0.39502	0	0	0.444743	0	0	0	0	0	0	0.47311	0	0	0.40337	0	0	0.509956	0	0	0	0	0	0	0.432316	0.336731	0	0	0	0	0.335266	0	0	0	0	0	0	0	0	0
'SIPS N3 EXPRESSION EMOTION'	0	0	0	0.483788	0.658011	0.541645	0	0.494574	0.517299	0.381491	0.498918	0.376482	0	0.493926	0	0	0	0	0	0.387393	0.824574	0	0	0.359471	0	0	0.808619	0.317061	0	0	0	0.480139	0	0.624209	0.524021	0	0	0	0	0.519642	0.343856	0	0	0	0	0.427471	0	0.558248	0.327272
'SIPS N4 EXPERIENCE EMOTION'	0	0.451188	0	0.448548	0	0.364562	0.494574	0	0.339321	0	0.466899	0.33585	0	0	0	0	0	0	0	0.335736	0.437335	0	0	0.380903	0	0.323922	0.509261	0	0	0	0.320616	0.359641	0	0.455344	0	0	0	0.350162	0	0.425446	0.416814	0	0	0	0	0.385392	0	0.472295	0.376582
'SIPS N5 IDEATIONAL RICHNESS'	0	0	0	0.392134	0.462663	0.393218	0.517299	0.339321	0	0.492807	0.3921	0	0	0.52232	0	0	0	0	0	0.38196	0.561969	0.456539	0	0.510272	0	0	0.600743	0.309449	0	0	0	0.34253	0	0.433263	0.478073	0	0	0	0	0.313397	0.407054	0	0	0	0.306618	0	0.414548	0.404406	0.330667
'SIPS N6 OCCUPATIONAL FUNCTIONING'	0	0.317547	0	0.503189	0.376087	0.39629	0.381491	0	0.492807	0	0.469905	0.469386	0	0.411686	0	0.352542	0	0.318734	0	0.470461	0.410011	0.409176	0.368821	0.485007	0	0	0.41887	0	0	0	0	0.32557	0	0.407558	0.523621	0	0.563762	0	0	0.41997	0.419403	0	0	0	0	0	0.46772	0	0
'SIPS D1 ODD BEHAVIOUR'	0.412941	0.484617	0	0.723139	0.597414	0.39502	0.498918	0.466899	0.3921	0.469905	0	0.549649	0	0.579491	0	0	0	0.420925	0.481181	0.656846	0.600252	0.436453	0	0.712779	0	0.497032	0.596534	0.370387	0.476555	0.386099	0.759231	0.743249	0	0.667797	0.699392	0	0.392445	0.583648	0.422938	0.806472	0.674778	0.412492	0	0.336982	0.466913	0.521861	0.480729	0.502937	0.40464
'SIPS D2 BIZARRE THINKING'	0.397518	0.405608	0	0.54519	0.325188	0	0.376482	0.33585	0	0.469386	0.549649	0	0	0.349919	0	0	0	0.380102	0.372509	0.738296	0.377901	0.344884	0	0.482663	0.335001	0.381332	0.421887	0.382335	0.410376	0.366449	0.455673	0.570234	0	0.434396	0.566484	0	0.400678	0.482511	0.404553	0.573943	0.706663	0	0	0	0.446617	0.468182	0.370275	0.399281	0.501486
'SIPS D3 TROUBLE ATTENTION'	0	0	0	0	0	0	0	0	0	0	0	0	0	0	0	0	0	0	0	0	0	0	0	0	0.572643	0	0	0	0	0	0	0	0.329836	0	0	0	0	0	0	0	0	0	0	0	0	0	0	0	0
'SIPS D4 PERSONAL HYGIENE'	0	0	0	0.439136	0.605416	0.444743	0.493926	0	0.52232	0.411686	0.579491	0.349919	0	0	0	0	0	0	0.489809	0.48521	0.515469	0.400306	0	0.565378	0.347136	0	0.592259	0.464214	0.330964	0	0.36384	0.457759	0	0.600139	0.849121	0	0.344588	0.344207	0.376023	0.582183	0.425969	0	0	0	0	0.481242	0.554915	0.447318	0.31286
'SIPS G1 SLEEP DISTURBANCES'	0.568175	0	0.501445	0	0	0	0	0	0	0	0	0	0	0	0	0.520011	0	0	0.350532	0.468449	0	0	0	0	0.436856	0	0	0	0	0.53249	0	0	0	0	0	0	0	0.355089	0	0	0.461432	0	0	0	0	0	0	0	0
'SIPS G2 DYSPHORIC MOOD'	0.305901	0	0	0	0	0	0	0	0	0.352542	0	0	0	0	0.520011	0	0	0.402501	0.480336	0.351798	0	0	0.521653	0	0.423886	0	0	0.338201	0.477683	0	0	0	0	0	0.310943	0	0.471146	0	0	0	0	0	0	0	0	0	0	0	0
'SIPS G3 MOTOR DISTURBANCES'	0	0	0	0	0	0	0	0	0	0	0	0	0	0	0	0	0	0	0	0	0	0	0	0	0	0	0	0	0.379104	0	0	0	0	0	0	0	0	0	0	0	0	0	0	0	0	0	0	0	0
'SIPS G4 IMPAIRED TOLLERANCE TO STRESS'	0	0	0	0.401691	0	0	0	0	0	0.318734	0.420925	0.380102	0	0	0	0.402501	0	0	0.560269	0.393896	0	0.389687	0	0	0	0	0	0	0.392637	0	0	0.348734	0	0	0.449189	0.37761	0.314347	0	0	0.474025	0	0	0	0	0	0	0	0	0
'BPRS Anxiety'	0.531791	0.550196	0.487494	0.377268	0.366708	0	0	0	0	0	0.481181	0.372509	0	0.489809	0.350532	0.480336	0	0.560269	0	0.527253	0	0.317247	0	0.364534	0.353959	0	0	0.356005	0.419609	0.441921	0	0	0.352382	0.384488	0.591842	0	0.403241	0.655423	0.574717	0.527791	0.595067	0	0.334655	0	0	0	0	0	0
'BPRS Bizarre Behaviour'	0.602177	0.378404	0.503805	0.653285	0.354335	0	0.387393	0.335736	0.38196	0.470461	0.656846	0.738296	0	0.48521	0.468449	0.351798	0	0.393896	0.527253	0	0.465155	0.337619	0	0.59787	0.437807	0.393262	0.461402	0.442988	0.416815	0.619022	0.54221	0.728131	0.368601	0.514901	0.609114	0	0.408297	0.543096	0.430781	0.648815	0.878948	0.327281	0	0	0.508531	0.411051	0.392332	0.441893	0.472243
'BPRS Blunted Affect'	0	0	0	0.564246	0.676883	0.47311	0.824574	0.437335	0.561969	0.410011	0.600252	0.377901	0	0.515469	0	0	0	0	0	0.465155	0	0.519704	0	0.577683	0	0	0.92427	0	0	0	0.315291	0.695025	0	0.714665	0.594033	0	0	0	0	0.640789	0.461655	0	0	0	0	0.426515	0.381797	0.493506	0
'BPRS Conceptual Disorganisation'	0	0	0	0.419026	0	0	0	0	0.456539	0.409176	0.436453	0.344884	0	0.400306	0	0	0	0.389687	0.317247	0.337619	0.519704	0	0.409517	0.554157	0	0	0.517649	0	0.41862	0	0.328922	0.502528	0	0.473738	0.536275	0	0.390484	0.31811	0	0.475482	0.380511	0	0	0	0.379956	0.374751	0.346134	0	0
'BPRS Depression'	0	0	0	0	0	0	0	0	0	0.368821	0	0	0	0	0	0.521653	0	0	0	0	0	0.409517	0	0	0	0	0	0	0.452864	0	0	0	0	0.306926	0.342053	0	0.466909	0.378067	0	0	0	0	0	0	0	0	0	0	0
'BPRS Disorientation'	0.387112	0	0	0.540586	0.514243	0.40337	0.359471	0.380903	0.510272	0.485007	0.712779	0.482663	0	0.565378	0	0	0	0	0.364534	0.59787	0.577683	0.554157	0	0	0.310015	0	0.606569	0.345846	0.419729	0.35357	0.564512	0.620116	0	0.562166	0.646152	0	0.4022	0.394869	0	0.643728	0.589545	0	0	0	0.388642	0	0.485723	0	0
'BPRS Distractibility'	0.441907	0.307998	0.387626	0	0	0	0	0	0	0	0	0.335001	0.572643	0.347136	0.436856	0.423886	0	0	0.353959	0.437807	0	0	0	0.310015	0	0	0	0	0.3331	0.441367	0	0	0.386108	0	0.340792	0	0	0.388928	0	0	0.46279	0	0	0	0	0	0.411037	0	0
'BPRS Elevated Mood'	0	0	0	0.374174	0	0	0	0.323922	0	0	0.497032	0.381332	0	0	0	0	0	0	0	0.393262	0	0	0	0	0	0	0	0.460395	0	0	0.442634	0	0	0	0	0	0	0	0	0	0.364544	0.500808	0	0.374805	0.464611	0.350813	0	0.393418	0.490412
'BPRS Emotional Withdrawal'	0	0	0	0.626851	0.69739	0.509956	0.808619	0.509261	0.600743	0.41887	0.596534	0.421887	0	0.592259	0	0	0	0	0	0.461402	0.92427	0.517649	0	0.606569	0	0	0	0	0	0	0.323557	0.64307	0	0.772083	0.66755	0	0	0.348721	0	0.621528	0.487522	0	0	0	0	0.460959	0.375831	0.490637	0.365473
'BPRS Excitement'	0	0	0	0	0	0	0.317061	0	0.309449	0	0.370387	0.382335	0	0.464214	0	0.338201	0	0	0.356005	0.442988	0	0	0	0.345846	0	0.460395	0	0	0	0	0	0	0.32752	0	0.490861	0	0	0	0.342304	0.369508	0.315773	0	0	0	0	0	0	0	0
'BPRS Guilt'	0.388006	0.413379	0	0.440832	0	0	0	0	0	0	0.476555	0.410376	0	0.330964	0	0.477683	0.379104	0.392637	0.419609	0.416815	0	0.41862	0.452864	0.419729	0.3331	0	0	0	0	0	0.513288	0.475912	0	0.489322	0.402364	0	0.45134	0.486623	0.455705	0.358162	0.420589	0.410499	0.45447	0	0.53495	0.323716	0.33863	0	0.398675
'BPRS Hallucinations'	0.638767	0.398712	0.891142	0.428082	0	0	0	0	0	0	0.386099	0.366449	0	0	0.53249	0	0	0	0.441921	0.619022	0	0	0	0.35357	0.441367	0	0	0	0	0	0.47194	0.475173	0	0	0.313506	0	0	0.522605	0	0	0.672716	0.326917	0.319334	0	0.398948	0.389448	0.370989	0.348306	0.313288
'BPRS Hostility'	0.455263	0.394586	0.348241	0.570334	0.352734	0	0	0.320616	0	0	0.759231	0.455673	0	0.36384	0	0	0	0	0	0.54221	0.315291	0.328922	0	0.564512	0	0.442634	0.323557	0	0.513288	0.47194	0	0.661903	0	0.41907	0.431974	0	0	0.463338	0.325532	0.505755	0.604726	0.440815	0.369449	0.390607	0.551247	0.453203	0.394764	0.43647	0.518484
'BPRS MAnnerisms'	0.395518	0.359119	0.330089	0.738303	0.439727	0	0.480139	0.359641	0.34253	0.32557	0.743249	0.570234	0	0.457759	0	0	0	0.348734	0	0.728131	0.695025	0.502528	0	0.620116	0	0	0.64307	0	0.475912	0.475173	0.661903	0	0	0.658705	0.60051	0	0	0.441154	0.382951	0.717687	0.677918	0.320955	0	0	0.536991	0.474172	0.358429	0.538406	0.439391
'BPRS Motor Hyperactivity'	0.346037	0	0	0	0	0	0	0	0	0	0	0	0.329836	0	0	0	0	0	0.352382	0.368601	0	0	0	0	0.386108	0	0	0.32752	0	0	0	0	0	0	0	0	0	0	0	0	0.361747	0	0	0	0	0	0	0	0
'BPRS Motor Retardation'	0	0.34774	0	0.684493	0.592244	0.432316	0.624209	0.455344	0.433263	0.407558	0.667797	0.434396	0	0.600139	0	0	0	0	0.384488	0.514901	0.714665	0.473738	0.306926	0.562166	0	0	0.772083	0	0.489322	0	0.41907	0.658705	0	0	0.689192	0	0.45597	0.444573	0.385918	0.632533	0.5479	0	0	0	0.404621	0.457962	0.406603	0.517434	0.396428
'BPRS Self neglect'	0	0.381532	0	0.610445	0.650991	0.336731	0.524021	0	0.478073	0.523621	0.699392	0.566484	0	0.849121	0	0.310943	0	0.449189	0.591842	0.609114	0.594033	0.536275	0.342053	0.646152	0.340792	0	0.66755	0.490861	0.402364	0.313506	0.431974	0.60051	0	0.689192	0	0	0.534665	0.519889	0.428703	0.76419	0.605671	0	0	0	0	0.490071	0.494858	0.453621	0
'BPRS Somatic'	0	0	0	0	0	0	0	0	0	0	0	0	0	0	0	0	0	0.37761	0	0	0	0	0	0	0	0	0	0	0	0	0	0	0	0	0	0	0	0	0	0	0	0	0	0	0	0	0	0	0
'BPRS Suicidality'	0	0.344274	0	0	0	0	0	0	0	0.563762	0.392445	0.400678	0	0.344588	0	0.471146	0	0.314347	0.403241	0.408297	0	0.390484	0.466909	0.4022	0	0	0	0	0.45134	0	0	0	0	0.45597	0.534665	0	0	0.390932	0.329798	0.472788	0.445965	0	0	0	0	0	0	0	0
'BPRS Suspiciouness'	0.697708	0.828746	0.500574	0.521127	0.405324	0	0	0.350162	0	0	0.583648	0.482511	0	0.344207	0.355089	0	0	0	0.655423	0.543096	0	0.31811	0.378067	0.394869	0.388928	0	0.348721	0	0.486623	0.522605	0.463338	0.441154	0	0.444573	0.519889	0	0.390932	0	0.611764	0.502936	0.747278	0.384053	0.525315	0.330291	0.470565	0.421915	0.320724	0.359615	0.335617
'BPRS Tension'	0.551231	0.452496	0	0	0	0	0	0	0	0	0.422938	0.404553	0	0.376023	0	0	0	0	0.574717	0.430781	0	0	0	0	0	0	0	0.342304	0.455705	0	0.325532	0.382951	0	0.385918	0.428703	0	0.329798	0.611764	0	0.449017	0.590858	0	0.357261	0	0.4039	0.395529	0.394345	0.407787	0.316941
'BPRS Uncooperativeness'	0.315803	0.392	0	0.62602	0.520185	0.335266	0.519642	0.425446	0.313397	0.41997	0.806472	0.573943	0	0.582183	0	0	0	0.474025	0.527791	0.648815	0.640789	0.475482	0	0.643728	0	0	0.621528	0.369508	0.358162	0	0.505755	0.717687	0	0.632533	0.76419	0	0.472788	0.502936	0.449017	0	0.613933	0	0	0	0	0.452475	0.324194	0.446408	0
'BPRS Unsual Thought'	0.757446	0.598908	0.581862	0.634947	0.446656	0	0.343856	0.416814	0.407054	0.419403	0.674778	0.706663	0	0.425969	0.461432	0	0	0	0.595067	0.878948	0.461655	0.380511	0	0.589545	0.46279	0.364544	0.487522	0.315773	0.420589	0.672716	0.604726	0.677918	0.361747	0.5479	0.605671	0	0.445965	0.747278	0.590858	0.613933	0	0.349083	0.341329	0.308317	0.595092	0.4766	0.486015	0.526874	0.500336
'SIPS P1 UNUSUAL THOUGHT T2'	0	0	0	0.431679	0	0	0	0	0	0	0.412492	0	0	0	0	0	0	0	0	0.327281	0	0	0	0	0	0.500808	0	0	0.410499	0.326917	0.440815	0.320955	0	0	0	0	0	0.384053	0	0	0.349083	0	0.672843	0.685243	0.660564	0	0	0	0.583879
'SIPS P2 PERSECUTORY IDEAS T2'	0.319268	0.384659	0.367511	0.333108	0	0	0	0	0	0	0	0	0	0	0	0	0	0	0.334655	0	0	0	0	0	0	0	0	0	0.45447	0.319334	0.369449	0	0	0	0	0	0	0.525315	0.357261	0	0.341329	0.672843	0	0.569578	0.554618	0	0	0	0.463403
'SIPS P4 PERCEPTUAL ABNORMALITIES T2'	0	0	0.347766	0.342545	0	0	0	0	0	0	0.336982	0	0	0	0	0	0	0	0	0	0	0	0	0	0	0.374805	0	0	0	0	0.390607	0	0	0	0	0	0	0.330291	0	0	0.308317	0.685243	0.569578	0	0.550798	0	0	0	0.404845
'SIPS P5 DISORGANIZED COMMUNICATION T2'	0.373314	0.314552	0.350519	0.585097	0	0	0	0	0.306618	0	0.466913	0.446617	0	0	0	0	0	0	0	0.508531	0	0.379956	0	0.388642	0	0.464611	0	0	0.53495	0.398948	0.551247	0.536991	0	0.404621	0	0	0	0.470565	0.4039	0	0.595092	0.660564	0.554618	0.550798	0	0.435447	0.422174	0.512883	0.632699
'SIPS N1 SOCIAL ANHEDONIA T2'	0	0.313128	0	0.449529	0.351056	0	0.427471	0.385392	0	0	0.521861	0.468182	0	0.481242	0	0	0	0	0	0.411051	0.426515	0.374751	0	0	0	0.350813	0.460959	0	0.323716	0.389448	0.453203	0.474172	0	0.457962	0.490071	0	0	0.421915	0.395529	0.452475	0.4766	0	0	0	0.435447	0	0.634175	0.713521	0.536765
'SIPS N2 AVOLITION T2'	0	0	0	0.327976	0.369731	0	0	0	0.414548	0.46772	0.480729	0.370275	0	0.554915	0	0	0	0	0	0.392332	0.381797	0.346134	0	0.485723	0.411037	0	0.375831	0	0.33863	0.370989	0.394764	0.358429	0	0.406603	0.494858	0	0	0.320724	0.394345	0.324194	0.486015	0	0	0	0.422174	0.634175	0	0.575786	0.420882
'SIPS N3 EXPRESSION EMOTION T2'	0	0	0	0.523027	0.449323	0	0.558248	0.472295	0.404406	0	0.502937	0.399281	0	0.447318	0	0	0	0	0	0.441893	0.493506	0	0	0	0	0.393418	0.490637	0	0	0.348306	0.43647	0.538406	0	0.517434	0.453621	0	0	0.359615	0.407787	0.446408	0.526874	0	0	0	0.512883	0.713521	0.575786	0	0.42495
'SIPS N4 EXPERIENCE EMOTION T2'	0	0	0	0.430946	0	0	0.327272	0.376582	0.330667	0	0.40464	0.501486	0	0.31286	0	0	0	0	0	0.472243	0	0	0	0	0	0.490412	0.365473	0	0.398675	0.313288	0.518484	0.439391	0	0.396428	0	0	0	0.335617	0.316941	0	0.500336	0.583879	0.463403	0.404845	0.632699	0.536765	0.420882	0.42495	0
'SIPS N5 IDEATIONAL RICHNESS T2'	0	0	0	0.518333	0.339386	0.305925	0	0	0.50909	0.53107	0.410869	0	0	0.396045	0	0	0	0	0.307171	0.42842	0.387026	0.430152	0	0.481531	0	0	0.38572	0.383545	0	0	0	0.394558	0	0.456989	0.42564	0	0	0	0	0.330395	0.390125	0	0.325261	0	0.477431	0.444974	0.502415	0.58779	0.311712
'SIPS N6 OCCUPATIONAL FUNCTIONING T2'	0.345693	0.408043	0	0.504669	0.348923	0.349806	0	0.332507	0.540066	0.55347	0.533905	0.498399	0.305802	0.451379	0	0	0	0	0.392912	0.49359	0.370523	0.439222	0	0.541998	0	0	0.419318	0.402322	0.464445	0	0.413642	0.393838	0	0.463953	0.470201	0	0.307901	0.477925	0.432296	0.37768	0.534488	0.362342	0.445379	0.308441	0.555532	0.557675	0.695314	0.536003	0.499657
'SIPS D1 ODD BEHAVIOUR T2'	0.305949	0.311465	0	0.510982	0	0	0	0.448171	0.387821	0.375018	0.521204	0.455295	0	0.307708	0	0	0	0	0	0.516134	0.311061	0.332744	0	0.401186	0	0.482602	0.367117	0	0.488502	0.317959	0.62639	0.570882	0	0.452418	0.362959	0	0.360121	0.366293	0.441712	0.356417	0.56778	0.434578	0.392851	0.42935	0.680701	0.538634	0.533066	0.625112	0.705234
'SIPS D2 BIZARRE THINKING T2'	0	0	0	0.396434	0	0	0	0	0	0	0.376788	0.372298	0	0	0	0	0	0	0	0.440125	0	0	0	0	0	0.571824	0	0.349014	0.419372	0	0.548065	0.352216	0	0	0	0	0	0.366472	0	0	0.422205	0.768339	0.559386	0.493477	0.578832	0.390917	0	0	0.779096
'SIPS D3 TROUBLE ATTENTION T2'	0	0	0	0	0	0	0	0	0	0	0	0	0.434638	0	0	0	0	0	0	0	0	0	0	0	0.318162	0	0	0	0	0	0	0	0	0	0	0	0	0	0	0	0	0	0	0	0.307255	0	0	0	0
'SIPS D4 PERSONAL HYGIENE T2'	0	0	0	0.317633	0	0	0	0.321322	0	0	0	0.337114	0	0	0	0	0	0	0	0	0	0	0	0	0	0	0	0	0.347672	0	0	0	0	0.312806	0	0	0	0	0.321005	0	0	0	0	0	0.48121	0.55458	0.459033	0.343865	0.409602
'SIPS G1 SLEEP DISTURBANCES T2'	0.330227	0.351527	0.315784	0	0	0	0	0	0	0	0	0	0	0	0	0	0	0	0	0	0	0	0	0	0	0.415153	0	0	0.31895	0	0.317476	0	0	0	0	0	0	0.412232	0	0	0	0.58645	0.484335	0.579994	0.507756	0	0	0	0.508853
'SIPS G2 DYSPHORIC MOOD T2'	0	0	0	0	0	0	0	0	0	0	0	0	0	0	0	0	0	0	0	0	0	0	0.312778	0	0	0	0	0	0	0	0	0	0	0	0	0	0	0	0	0	0	0.463415	0	0.414639	0	0	0	0	0
'SIPS G3 MOTOR DISTURBANCES T2'	0.543403	0.333458	0.50808	0.365004	0	0	0	0.39997	0	0	0.438184	0.39425	0	0	0	0	0	0	0	0.475143	0	0	0	0.325381	0.311112	0	0	0	0.411394	0.516578	0.538512	0.400611	0	0	0	0	0	0.384661	0.379362	0	0.536668	0	0.305724	0.392588	0.394098	0	0.414923	0.361547	0.397687
'SIPS G4 IMPAIRED TOLLERANCE TO STRESS T2'	0.452871	0.512371	0	0.425469	0.384437	0	0	0	0	0	0.591115	0	0	0	0	0	0	0.35225	0.434122	0.367941	0	0.442813	0.432361	0.505926	0.310977	0	0	0	0.419944	0.347341	0.538544	0.419056	0	0	0.330559	0	0	0.573234	0.313087	0.397005	0.478353	0.443481	0.357561	0.534688	0.444821	0	0.414857	0	0
'BPRS Anxiety T2'	0	0	0	0	0	0	0	0	0	0	0.338916	0	0	0	0	0	0	0.432719	0.424018	0	0	0	0	0	0	0.332604	0	0	0	0	0	0	0.309104	0	0	0	0	0.325549	0	0	0	0.31222	0	0.349105	0	0	0	0	0
'BPRS Bizarre Behaviour T2'	0.450536	0.570313	0.389521	0.590948	0	0	0	0.441017	0	0	0.577669	0.499535	0	0	0	0	0	0	0.338032	0.522932	0	0	0	0.37876	0	0.615036	0	0	0.473105	0.392159	0.607535	0.4391	0	0.309675	0	0	0	0.586737	0.39913	0	0.628311	0.691125	0.570311	0.64172	0.695881	0.45314	0.363587	0.387399	0.682134
'BPRS Blunted Affect T2'	0	0.324101	0.312986	0.663965	0.367159	0.371544	0.49446	0.450507	0.4821	0.436596	0.529033	0.466731	0	0.430022	0	0	0	0	0.306639	0.578672	0.485646	0.357691	0	0.341319	0	0.459132	0.504842	0	0.311181	0.387321	0.396818	0.539008	0	0.559995	0.432846	0	0	0.449278	0.352301	0.410164	0.598448	0.459775	0.399925	0.363537	0.688758	0.664371	0.600525	0.761872	0.627
'BPRS Conceptual Disorganisation T2'	0	0.374113	0	0.584964	0	0.369126	0	0.341717	0.488709	0.364942	0.431639	0.37244	0	0	0	0	0	0	0	0.371895	0	0	0	0	0	0.416774	0.322037	0	0.446102	0	0.399457	0.392983	0	0.443588	0	0	0	0.426147	0	0	0.432654	0.563664	0.544389	0.528756	0.726857	0	0.33138	0.41575	0.598014
'BPRS Depression T2'	0	0	0	0	0	0	0	0	0	0	0	0	0	0	0	0	0	0	0	0	0	0	0.314581	0	0	0	0	0	0	0	0	0	0	0	0	0	0	0	0	0	0	0.411724	0	0.432457	0	0	0	0	0
'BPRS Disorientation T2'	0.336785	0	0	0.390554	0	0	0	0	0.387567	0.34696	0.417153	0	0	0.328693	0	0	0	0	0	0.333431	0	0.376062	0	0.397573	0	0	0	0	0.419507	0	0.43589	0	0	0	0.306524	0	0	0.332908	0.433898	0.314934	0.376563	0	0.385586	0.357134	0.588279	0.466062	0.578112	0.455978	0.35197
'BPRS Distractibility T2'	0	0	0	0	0	0	0	0	0	0	0	0	0	0	0	0	0	0	0	0	0	0	0	0	0	0	0	0	0	0	0	0	0	0	0	0	0	0	0	-0.342801	0	0	0	0	0.365792	0	0	0	0
'BPRS Elevated Mood T2'	0	0	0	0	0	0	0	0	0	0	0	0	0	0	0	0	0	0	0	0	0	0	0	0	0	0.488176	0	0.449121	0	0	0	0	0	0	0	0	0	0	0	0	0	0.533521	0.402076	0.334675	0	0	0	0	0
'BPRS Emotional Withdrawal T2'	0	0	0	0.654392	0.31327	0.336892	0.460928	0.56619	0.416948	0.332558	0.539227	0.359947	0	0.351111	0	0	0	0	0	0.474502	0.47922	0.316921	0	0.324941	0	0.478438	0.491186	0	0	0	0.429987	0.569173	0	0.590246	0.357692	0	0	0.375847	0.365895	0.42897	0.520996	0.341802	0.334479	0.337148	0.647924	0.615198	0.480072	0.809441	0.524611
'BPRS Excitement T2'	0	0.365288	0	0.336427	0	0	0	0	0	0	0.309279	0	0	0	0	0	0	0	0	0	0	0	0	0	0	0.327815	0	0.384937	0	0	0.391723	0	0	0	0	0	0	0.30624	0	0	0	0.527625	0.413399	0.423342	0	0	0	0	0.322376
'BPRS Guilt T2'	0	0	0	0	0	0	0	0	0	0	0	0	0	0	0	0	0	0.326989	0	0	0	0	0	0	0	0	0	0	0	0	0	0	0	0	0	0	0	0.331436	0	0	0	0.383325	0.42954	0.465826	0	0	0	0	0
'BPRS Hallucinations T2'	0	0	0	0	0	0	0	0	0	0	0	0	0	0	0	0	0	0	0	0	0	0	0	0	0	0	0	0	0	0	0	0	0	0	0	0	0	0	0	0	0	0.482675	0.355648	0.824198	0.41069	0	0	0	0
'BPRS Hostility T2'	0	0	0	0.427049	0	0	0	0	0	0	0	0	0	0	0	0	0	0	0	0	0	0	0	0	0	0.326471	0	0	0.36536	0	0	0	0	0	0	0	0	0	0	0	0	0.637509	0.460691	0.352889	0.453588	0	0	0	0.484011
'BPRS MAnnerisms T2'	0.386778	0.35951	0.34518	0.552604	0	0	0	0.454158	0.310626	0	0.60367	0.556168	0	0	0	0	0	0	0	0.593449	0.31143	0.329253	0	0.4692	0	0.557602	0.355499	0.358064	0.458837	0.425399	0.632619	0.574392	0	0.497	0.352025	0	0	0.48736	0.50541	0.411648	0.653443	0.626443	0.445829	0.396469	0.765949	0.540057	0.477238	0.507987	0.785524
'BPRS Motor Hyperactivity T2'	0	0	0	0	0	0	0	0	0	0	0	0	0	0	0.41832	0.41674	0	0	0	0	0	0	0.320535	0	0	0	0	0.346138	0	0	0	0	0	0	0	0	0	0	0	0	0	0.334513	0.311382	0	0	0	0	0	0
'BPRS Motor Retardation T2'	0.454657	0.435662	0.398556	0.661449	0.374873	0.344796	0.337313	0.497181	0.436735	0.462831	0.682581	0.599208	0	0.42957	0	0	0	0	0.377989	0.654671	0.418712	0.424905	0	0.49713	0	0.523636	0.446088	0.323867	0.493494	0.497282	0.689302	0.633257	0	0.534806	0.461016	0	0	0.53968	0.510511	0.475303	0.700188	0.466653	0.517713	0.475023	0.755355	0.653811	0.593404	0.738902	0.669784
'BPRS Self neglect T2'	0	0	0	0.344622	0	0	0	0	0	0	0	0	0	0	0	0	0	0	0	0	0	0	0	0	0	0	0	0	0.366167	0	0.311817	0.313703	0	0	0	0	0	0	0.442689	0	0.309218	0.374593	0.406403	0.338036	0.696925	0.543748	0.469378	0.514133	0.475723
'BPRS Somatic T2'	0	0	0	0.364718	0	0	0	0	0	0	0	0	0	0	0	0	0.318323	0.317973	0	0	0	0	0	0	0	0	0	0	0.349985	0	0	0	0	0	0	0	0.314906	0	0	0	0	0.545363	0.337389	0.494605	0.532762	0	0	0	0
'BPRS Suicidality T2'	0	0	0	0	0	0	0	0	0	0	0	0	0	0	0	0	0	0	0	0	0	0	0	0.314608	0	0	0	0	0	0	0	0	0	0	0	0	0	0	0	0	0	0.343533	0	0.51596	0	0	0	0	0
'BPRS Suspiciouness T2'	0	0.350262	0	0.345292	0	0	0	0	0	0	0	0	0	0	0	0	0	0	0	0	0	0	0	0	0	0.32122	0	0	0	0	0	0	0	0	0	0	0	0.449739	0	0	0.307208	0.557466	0.790923	0.48526	0.482252	0.329294	0	0	0.427479
'BPRS Tension T2'	0	0	0.424047	0.470945	0.346353	0	0	0	0	0	0.400971	0	0	0	0	0	0	0	0.372482	0.401925	0	0	0	0	0	0	0	0	0	0.423355	0.374409	0.348722	0	0.307215	0	0	0	0.390802	0	0	0.40688	0.471558	0.439745	0.42218	0.467178	0.454915	0.323815	0.427357	0.405753
'BPRS Uncooperativeness T2'	0	0.308011	0	0.410318	0	0	0	0.477183	0	0	0.352381	0.535519	0	0	0	0	0	0.308809	0	0.434602	0	0	0	0	0	0.431205	0	0	0	0	0	0.38303	0	0	0	0.319663	0	0.306654	0.31585	0.31798	0.398283	0.326255	0	0	0.425749	0.472448	0	0.366422	0.518992
'BPRS Unsual Thought T2'	0	0.365791	0	0.370579	0	0	0	0	0	0	0	0	0	0	0	0	0	0	0	0.308676	0	0	0	0	0	0.459573	0	0	0.386613	0	0	0	0	0	0	0	0	0.415366	0	0	0.391528	0.75994	0.631914	0.706542	0.627321	0.355928	0	0	0.630358
[truncated: 33 more columns]

## Sheet: Symptom Loading in MTSN
	Symptoms Loading According to First Cross-Sectional Network Dimension	Symptoms Loading According to Second Longitudinal Network Dimension
'SIPS P1 UNUSUAL THOUGHT'	0.0697187	0.00732389
'SIPS P2 PERSECUTORY IDEAS'	0.0938948	0.0370866
'SIPS P4 PERCEPTUAL ABNORMALITIES'	0.0444681	0.0391994
'SIPS P5 DISORGANIZED COMMUNICATION'	0.174258	0.00863136
'SIPS N1 SOCIAL ANHEDONIA'	0.125864	-0.124341
'SIPS N2 AVOLITION'	0.0733786	-0.0824294
'SIPS N3 EXPRESSION EMOTION'	0.113479	-0.128322
'SIPS N4 EXPERIENCE EMOTION'	0.126911	-0.0123143
'SIPS N5 IDEATIONAL RICHNESS'	0.127313	-0.0839031
'SIPS N6 OCCUPATIONAL FUNCTIONING'	0.102236	-0.110634
'SIPS D1 ODD BEHAVIOUR'	0.184476	-0.0576335
'SIPS D2 BIZARRE THINKING'	0.158455	-0.0469037
'SIPS D3 TROUBLE ATTENTION'	-0.0117255	-0.0116457
'SIPS D4 PERSONAL HYGIENE'	0.136163	-0.143109
'SIPS G1 SLEEP DISTURBANCES'	-0.00526578	-0.0249281
'SIPS G2 DYSPHORIC MOOD'	-0.0254105	-0.0570056
'SIPS G3 MOTOR DISTURBANCES'	-0.0028552	0.00423326
'SIPS G4 IMPAIRED TOLLERANCE TO STRESS'	0.0109195	-0.0483341
'BPRS Anxiety'	0.0523843	-0.0717128
'BPRS Bizarre Behaviour'	0.159759	-0.0569766
'BPRS Blunted Affect'	0.151277	-0.1438
'BPRS Conceptual Disorganisation'	0.117505	-0.0814254
'BPRS Depression'	-0.0133125	-0.0328224
'BPRS Disorientation'	0.147112	-0.114153
'BPRS Distractibility'	1.97146e-05	-0.054425
'BPRS Elevated Mood'	0.074222	0.137743
'BPRS Emotional Withdrawal'	0.164626	-0.134684
'BPRS Excitement'	0.0352994	-0.0391764
'BPRS Guilt'	0.0890812	0.0386719
'BPRS Hallucinations'	0.090539	0.0233178
'BPRS Hostility'	0.164504	0.0574382
'BPRS MAnnerisms'	0.193933	-0.0476401
'BPRS Motor Hyperactivity'	-0.0050879	-0.0184835
'BPRS Motor Retardation'	0.177794	-0.108045
'BPRS Self neglect'	0.144378	-0.173034
'BPRS Somatic'	-0.00347763	-0.00144504
'BPRS Suicidality'	0.0435295	-0.0792926
'BPRS Suspiciouness'	0.115292	0.0429367
'BPRS Tension'	0.120778	0.0110912
'BPRS Uncooperativeness'	0.163615	-0.142376
'BPRS Unsual Thought'	0.172579	-0.0167886
'SIPS P1 UNUSUAL THOUGHT T2'	0.0202184	0.238264
'SIPS P2 PERSECUTORY IDEAS T2'	0.0340835	0.199306
'SIPS P4 PERCEPTUAL ABNORMALITIES T2'	4.0742e-06	0.216795
'SIPS P5 DISORGANIZED COMMUNICATION T2'	0.128759	0.183395
'SIPS N1 SOCIAL ANHEDONIA T2'	0.170376	0.0150159
'SIPS N2 AVOLITION T2'	0.160953	-0.0249201
'SIPS N3 EXPRESSION EMOTION T2'	0.183863	-0.00826408
'SIPS N4 EXPERIENCE EMOTION T2'	0.141328	0.160374
'SIPS N5 IDEATIONAL RICHNESS T2'	0.141646	-0.00582701
'SIPS N6 OCCUPATIONAL FUNCTIONING T2'	0.159444	0.0370794
'SIPS D1 ODD BEHAVIOUR T2'	0.18099	0.0923323
'SIPS D2 BIZARRE THINKING T2'	0.0983996	0.211245
'SIPS D3 TROUBLE ATTENTION T2'	-0.00382283	0.010718
'SIPS D4 PERSONAL HYGIENE T2'	0.0937117	0.0713288
'SIPS G1 SLEEP DISTURBANCES T2'	-0.00943929	0.200085
'SIPS G2 DYSPHORIC MOOD T2'	-0.0795933	0.0895888
'SIPS G3 MOTOR DISTURBANCES T2'	0.0982957	0.0558553
'SIPS G4 IMPAIRED TOLLERANCE TO STRESS T2'	0.0285149	0.073159
'BPRS Anxiety T2'	-0.0520056	0.0794922
'BPRS Bizarre Behaviour T2'	0.0955058	0.224793
'BPRS Blunted Affect T2'	0.18001	0.0670313
'BPRS Conceptual Disorganisation T2'	0.0908527	0.172236
'BPRS Depression T2'	-0.0739627	0.0861701
'BPRS Disorientation T2'	0.12845	0.0830821
'BPRS Distractibility T2'	-0.0160907	0.0277314
'BPRS Elevated Mood T2'	-0.0254323	0.103071
'BPRS Emotional Withdrawal T2'	0.188964	0.0537566
'BPRS Excitement T2'	0.00681515	0.145817
'BPRS Guilt T2'	-0.0630458	0.124146
'BPRS Hallucinations T2'	-0.0553595	0.136617
'BPRS Hostility T2'	0.0174455	0.178706
'BPRS MAnnerisms T2'	0.166536	0.139888
'BPRS Motor Hyperactivity T2'	-0.046832	0.0132218
'BPRS Motor Retardation T2'	0.1876	0.0843695
'BPRS Self neglect T2'	0.105346	0.148687
'BPRS Somatic T2'	-0.053499	0.12083
'BPRS Suicidality T2'	-0.0585546	0.0644356
'BPRS Suspiciouness T2'	0.0220623	0.20124
'BPRS Tension T2'	0.0790465	0.147106
'BPRS Uncooperativeness T2'	0.098612	0.122541
'BPRS Unsual Thought T2'	0.0178866	0.25462

## Sheet: Shortest Longitudinal Paths
	'SIPS P1 UNUSUAL THOUGHT'	'SIPS P2 PERSECUTORY IDEAS'	'SIPS P4 PERCEPTUAL ABNORMALITIES'	'SIPS P5 DISORGANIZED COMMUNICATION'	'SIPS N1 SOCIAL ANHEDONIA'	'SIPS N2 AVOLITION'	'SIPS N3 EXPRESSION EMOTION'	'SIPS N4 EXPERIENCE EMOTION'	'SIPS N5 IDEATIONAL RICHNESS'	'SIPS N6 OCCUPATIONAL FUNCTIONING'	'SIPS D1 ODD BEHAVIOUR'	'SIPS D2 BIZARRE THINKING'	'SIPS D3 TROUBLE ATTENTION'	'SIPS D4 PERSONAL HYGIENE'	'SIPS G1 SLEEP DISTURBANCES'	'SIPS G2 DYSPHORIC MOOD'	'SIPS G3 MOTOR DISTURBANCES'	'SIPS G4 IMPAIRED TOLLERANCE TO STRESS'	'BPRS Anxiety'	'BPRS Bizarre Behaviour'	'BPRS Blunted Affect'	'BPRS Conceptual Disorganisation'	'BPRS Depression'	'BPRS Disorientation'	'BPRS Distractibility'	'BPRS Elevated Mood'	'BPRS Emotional Withdrawal'	'BPRS Excitement'	'BPRS Guilt'	'BPRS Hallucinations'	'BPRS Hostility'	'BPRS MAnnerisms'	'BPRS Motor Hyperactivity'	'BPRS Motor Retardation'	'BPRS Self neglect'	'BPRS Somatic'	'BPRS Suicidality'	'BPRS Suspiciouness'	'BPRS Tension'	'BPRS Uncooperativeness'	'BPRS Unsual Thought'	'SIPS P1 UNUSUAL THOUGHT T2'	'SIPS P2 PERSECUTORY IDEAS T2'	'SIPS P4 PERCEPTUAL ABNORMALITIES T2'	'SIPS P5 DISORGANIZED COMMUNICATION T2'	'SIPS N1 SOCIAL ANHEDONIA T2'	'SIPS N2 AVOLITION T2'	'SIPS N3 EXPRESSION EMOTION T2'	'SIPS N4 EXPERIENCE EMOTION T2'
'SIPS P1 UNUSUAL THOUGHT'	0	1	0	0	0	0	0	0	0	0	0	0	0	0	7	0	0	0	0	0	0	0	0	0	1	0	0	0	0	0	0	0	0	0	0	0	0	2	0	0	10	0	1	0	3	0	0	0	0
'SIPS P2 PERSECUTORY IDEAS'	1	0	0	0	0	0	0	0	0	0	0	0	0	0	0	0	0	0	0	0	0	0	0	0	0	0	0	0	0	0	0	0	0	0	0	0	0	1	0	0	2	0	1	0	1	1	0	0	0
'SIPS P4 PERCEPTUAL ABNORMALITIES'	0	0	0	0	0	0	0	0	0	0	0	0	0	0	3	0	0	0	0	0	0	0	0	0	1	0	0	0	0	2	0	0	0	0	0	0	0	1	0	0	7	0	3	5	2	0	0	0	0
'SIPS P5 DISORGANIZED COMMUNICATION'	0	0	0	0	6	2	1	0	0	2	0	0	0	1	0	0	0	5	0	0	5	1	0	1	0	0	8	0	0	0	0	1	0	3	5	0	0	0	0	5	0	4	1	1	4	1	1	1	1
'SIPS N1 SOCIAL ANHEDONIA'	0	0	0	6	0	0	0	0	0	0	8	0	0	0	0	0	0	0	0	0	0	0	0	0	0	0	0	0	0	0	0	0	0	0	1	0	0	2	0	0	0	0	0	0	0	2	1	2	0
'SIPS N2 AVOLITION'	0	0	0	2	0	0	1	0	0	0	3	0	0	1	0	0	0	0	0	0	0	0	0	1	0	0	1	0	0	0	0	0	0	0	0	0	0	0	0	0	0	0	0	0	0	0	0	0	0
'SIPS N3 EXPRESSION EMOTION'	0	0	0	1	0	1	0	0	0	0	6	0	0	0	0	0	0	0	0	0	0	0	0	0	0	0	0	2	0	0	0	0	0	0	0	0	0	0	0	0	0	0	0	0	0	2	0	6	1
'SIPS N4 EXPERIENCE EMOTION'	0	0	0	0	0	0	0	0	0	0	1	0	0	0	0	0	0	0	0	0	0	0	0	0	0	0	0	0	0	0	0	0	0	0	0	0	0	0	0	0	0	0	0	0	0	1	0	1	1
'SIPS N5 IDEATIONAL RICHNESS'	0	0	0	0	0	0	0	0	0	0	0	0	0	0	0	0	0	0	0	0	0	0	0	3	0	0	0	1	0	0	0	0	0	0	0	0	0	0	0	0	0	0	0	0	1	0	1	1	1
'SIPS N6 OCCUPATIONAL FUNCTIONING'	0	0	0	2	0	0	0	0	0	0	3	0	0	0	0	2	0	0	0	0	0	0	2	1	0	0	0	0	0	0	0	0	0	0	0	0	1	0	0	0	0	0	0	0	0	0	1	0	0
'SIPS D1 ODD BEHAVIOUR'	0	0	0	0	8	3	6	1	0	3	0	0	0	9	0	0	0	7	0	0	8	0	0	2	0	0	4	1	0	0	0	0	0	3	3	0	1	0	0	4	0	7	0	2	2	2	1	1	2
'SIPS D2 BIZARRE THINKING'	0	0	0	0	0	0	0	0	0	0	0	0	0	0	0	0	0	1	0	0	0	0	0	1	0	0	0	1	0	0	0	0	0	0	1	0	1	0	0	0	1	0	0	0	3	1	1	1	2
'SIPS D3 TROUBLE ATTENTION'	0	0	0	0	0	0	0	0	0	0	0	0	0	0	0	0	0	0	0	0	0	0	0	0	8	0	0	0	0	0	0	0	3	0	0	0	0	0	0	0	0	0	0	0	0	0	0	0	0
'SIPS D4 PERSONAL HYGIENE'	0	0	0	1	0	1	0	0	0	0	9	0	0	0	0	0	0	0	1	0	0	0	0	1	0	0	0	2	0	0	0	0	0	0	0	0	0	0	0	0	0	0	0	0	0	3	2	1	1
'SIPS G1 SLEEP DISTURBANCES'	7	0	3	0	0	0	0	0	0	0	0	0	0	0	0	0	0	0	1	5	0	0	0	0	3	0	0	0	0	3	0	0	0	0	0	0	0	2	0	0	20	0	0	0	0	0	0	0	0
'SIPS G2 DYSPHORIC MOOD'	0	0	0	0	0	0	0	0	0	2	0	0	0	0	0	0	0	3	3	4	0	0	3	0	2	0	0	0	25	0	0	0	0	0	0	0	1	0	0	0	0	0	0	0	0	0	0	0	0
'SIPS G3 MOTOR DISTURBANCES'	0	0	0	0	0	0	0	0	0	0	0	0	0	0	0	0	0	0	0	0	0	0	0	0	0	0	0	0	25	0	0	0	0	0	0	0	0	0	0	0	0	0	0	0	0	0	0	0	0
'SIPS G4 IMPAIRED TOLLERANCE TO STRESS'	0	0	0	5	0	0	0	0	0	0	7	1	0	0	0	3	0	0	0	2	0	0	0	0	0	0	0	0	3	0	0	0	0	0	2	8	0	0	0	1	0	0	0	0	0	0	0	0	0
'BPRS Anxiety'	0	0	0	0	0	0	0	0	0	0	0	0	0	1	1	3	0	0	0	0	0	0	0	0	0	0	0	1	0	0	0	0	0	0	3	0	1	5	2	0	10	0	1	0	0	0	0	0	0
'BPRS Bizarre Behaviour'	0	0	0	0	0	0	0	0	0	0	0	0	0	0	5	4	0	2	0	0	0	0	0	0	1	0	0	2	0	0	0	1	3	0	0	0	0	0	0	0	0	1	0	0	3	1	1	2	1
'BPRS Blunted Affect'	0	0	0	5	0	0	0	0	0	0	8	0	0	0	0	0	0	0	0	0	0	0	0	1	0	0	0	0	0	0	0	4	0	0	1	0	0	0	0	0	0	0	0	0	0	2	1	1	0
'BPRS Conceptual Disorganisation'	0	0	0	1	0	0	0	0	0	0	0	0	0	0	0	0	0	0	0	0	0	0	1	0	0	0	0	0	0	0	0	0	0	0	0	0	0	0	0	0	0	0	0	0	5	1	1	0	0
'BPRS Depression'	0	0	0	0	0	0	0	0	0	2	0	0	0	0	0	3	0	0	0	0	0	1	0	0	0	0	0	0	18	0	0	0	0	1	2	0	2	2	0	0	0	0	0	0	0	0	0	0	0
'BPRS Disorientation'	0	0	0	1	0	1	0	0	3	1	2	1	0	1	0	0	0	0	0	0	1	0	0	0	0	0	1	2	0	0	0	0	0	1	1	0	1	0	0	0	0	0	0	0	3	0	1	0	0
'BPRS Distractibility'	1	0	1	0	0	0	0	0	0	0	0	0	8	0	3	2	0	0	0	1	0	0	0	0	0	0	0	0	0	1	0	0	0	0	0	0	0	5	0	0	16	0	0	0	0	0	9	0	0
'BPRS Elevated Mood'	0	0	0	0	0	0	0	0	0	0	0	0	0	0	0	0	0	0	0	0	0	0	0	0	0	0	0	4	0	0	0	0	0	0	0	0	0	0	0	0	0	3	0	3	1	1	0	1	1
'BPRS Emotional Withdrawal'	0	0	0	8	0	1	0	0	0	0	4	0	0	0	0	0	0	0	0	0	0	0	0	1	0	0	0	0	0	0	0	0	0	0	1	0	0	0	0	0	1	0	0	0	0	3	1	1	1
'BPRS Excitement'	0	0	0	0	0	0	2	0	1	0	1	1	0	2	0	0	0	0	1	2	0	0	0	2	0	4	0	0	0	0	0	0	3	0	8	0	0	0	1	2	0	0	0	0	0	0	0	0	0
'BPRS Guilt'	0	0	0	0	0	0	0	0	0	0	0	0	0	0	0	25	25	3	0	0	0	0	18	0	0	0	0	0	0	0	0	0	0	0	0	0	3	0	0	0	0	3	8	0	7	3	2	0	4
'BPRS Hallucinations'	0	0	2	0	0	0	0	0	0	0	0	0	0	0	3	0	0	0	0	0	0	0	0	0	1	0	0	0	0	0	0	0	0	0	0	0	0	1	0	0	0	2	1	0	3	2	1	1	1
'BPRS Hostility'	0	0	0	0	0	0	0	0	0	0	0	0	0	0	0	0	0	0	0	0	0	0	0	0	0	0	0	0	0	0	0	0	0	0	0	0	0	0	0	0	0	2	1	1	4	1	1	1	1
'BPRS MAnnerisms'	0	0	0	1	0	0	0	0	0	0	0	0	0	0	0	0	0	0	0	1	4	0	0	0	0	0	0	0	0	0	0	0	0	0	0	0	0	0	0	1	0	1	0	0	8	1	1	1	1
'BPRS Motor Hyperactivity'	0	0	0	0	0	0	0	0	0	0	0	0	3	0	0	0	0	0	0	3	0	0	0	0	0	0	0	3	0	0	0	0	0	0	0	0	0	0	0	0	24	0	0	0	0	0	0	0	0
'BPRS Motor Retardation'	0	0	0	3	0	0	0	0	0	0	3	0	0	0	0	0	0	0	0	0	0	0	1	1	0	0	0	0	0	0	0	0	0	0	1	0	2	0	0	0	1	0	0	0	1	1	1	1	1
'BPRS Self neglect'	0	0	0	5	1	0	0	0	0	0	3	1	0	0	0	0	0	2	3	0	1	0	2	1	0	0	1	8	0	0	0	0	0	1	0	0	3	4	0	0	3	0	0	0	0	7	4	4	0
'BPRS Somatic'	0	0	0	0	0	0	0	0	0	0	0	0	0	0	0	0	0	8	0	0	0	0	0	0	0	0	0	0	0	0	0	0	0	0	0	0	0	0	0	0	0	0	0	0	0	0	0	0	0
'BPRS Suicidality'	0	0	0	0	0	0	0	0	0	1	1	1	0	0	0	1	0	0	1	0	0	0	2	1	0	0	0	0	3	0	0	0	0	2	3	0	0	2	0	0	9	0	0	0	0	0	0	0	0
'BPRS Suspiciouness'	2	1	1	0	2	0	0	0	0	0	0	0	0	0	2	0	0	0	5	0	0	0	2	0	5	0	0	0	0	1	0	0	0	0	4	0	2	0	2	3	0	2	6	1	2	1	1	1	1
'BPRS Tension'	0	0	0	0	0	0	0	0	0	0	0	0	0	0	0	0	0	0	2	0	0	0	0	0	0	0	0	1	0	0	0	0	0	0	0	0	0	2	0	0	0	0	1	0	3	1	1	1	1
'BPRS Uncooperativeness'	0	0	0	5	0	0	0	0	0	0	4	0	0	0	0	0	0	1	0	0	0	0	0	0	0	0	0	2	0	0	0	1	0	0	0	0	0	3	0	0	1	0	0	0	0	2	1	2	0
'BPRS Unsual Thought'	10	2	7	0	0	0	0	0	0	0	0	1	0	0	20	0	0	0	10	0	0	0	0	0	16	0	1	0	0	0	0	0	24	1	3	0	9	0	0	1	0	3	2	0	12	4	6	8	8
'SIPS P1 UNUSUAL THOUGHT T2'	0	0	0	4	0	0	0	0	0	0	7	0	0	0	0	0	0	0	0	1	0	0	0	0	0	3	0	0	3	2	2	1	0	0	0	0	0	2	0	0	3	0	0	0	1	0	0	0	0
'SIPS P2 PERSECUTORY IDEAS T2'	1	1	3	1	0	0	0	0	0	0	0	0	0	0	0	0	0	0	1	0	0	0	0	0	0	0	0	0	8	1	1	0	0	0	0	0	0	6	1	0	2	0	0	0	0	0	0	0	0
'SIPS P4 PERCEPTUAL ABNORMALITIES T2'	0	0	5	1	0	0	0	0	0	0	2	0	0	0	0	0	0	0	0	0	0	0	0	0	0	3	0	0	0	0	1	0	0	0	0	0	0	1	0	0	0	0	0	0	1	0	0	0	0
'SIPS P5 DISORGANIZED COMMUNICATION T2'	3	1	2	4	0	0	0	0	1	0	2	3	0	0	0	0	0	0	0	3	0	5	0	3	0	1	0	0	7	3	4	8	0	1	0	0	0	2	3	0	12	1	0	1	0	0	0	0	0
'SIPS N1 SOCIAL ANHEDONIA T2'	0	1	0	1	2	0	2	1	0	0	2	1	0	3	0	0	0	0	0	1	2	1	0	0	0	1	3	0	3	2	1	1	0	1	7	0	0	1	1	2	4	0	0	0	0	0	1	0	0
'SIPS N2 AVOLITION T2'	0	0	0	1	1	0	0	0	1	1	1	1	0	2	0	0	0	0	0	1	1	1	0	1	9	0	1	0	2	1	1	1	0	1	4	0	0	1	1	1	6	0	0	0	0	1	0	1	0
'SIPS N3 EXPRESSION EMOTION T2'	0	0	0	1	2	0	6	1	1	0	1	1	0	1	0	0	0	0	0	2	1	0	0	0	0	1	1	0	0	1	1	1	0	1	4	0	0	1	1	2	8	0	0	0	0	0	1	0	0
'SIPS N4 EXPERIENCE EMOTION T2'	0	0	0	1	0	0	1	1	1	0	2	2	0	1	0	0	0	0	0	1	0	0	0	0	0	1	1	0	4	1	1	1	0	1	0	0	0	1	1	0	8	0	0	0	0	0	0	0	0
'SIPS N5 IDEATIONAL RICHNESS T2'	0	0	0	2	2	1	0	0	2	5	1	0	0	1	0	0	0	0	1	3	1	2	0	1	0	0	1	2	0	0	0	1	0	2	1	0	0	0	0	1	1	0	0	0	0	0	1	1	0
'SIPS N6 OCCUPATIONAL FUNCTIONING T2'	1	3	0	1	1	4	0	1	5	11	3	2	29	6	0	0	0	0	4	2	1	4	0	6	0	0	2	11	8	0	1	1	0	1	3	0	3	3	2	2	5	1	2	1	1	2	2	1	1
'SIPS D1 ODD BEHAVIOUR T2'	0	1	0	1	0	0	0	1	1	1	3	1	0	1	0	0	0	0	0	1	0	1	0	1	0	1	1	0	4	1	1	2	0	1	1	0	7	1	1	1	7	0	0	1	0	0	0	1	1
'SIPS D2 BIZARRE THINKING T2'	0	0	0	1	0	0	0	0	0	0	2	1	0	0	0	0	0	0	0	4	0	0	0	0	0	1	0	4	4	0	1	1	0	0	0	0	0	1	0	0	3	0	1	0	0	0	0	0	0
'SIPS D3 TROUBLE ATTENTION T2'	0	0	0	0	0	0	0	0	0	0	0	0	5	0	0	0	0	0	0	0	0	0	0	0	7	0	0	0	0	0	0	0	0	0	0	0	0	0	0	0	0	0	0	0	1	0	0	0	0
'SIPS D4 PERSONAL HYGIENE T2'	0	0	0	1	0	0	0	1	0	0	0	1	0	0	0	0	0	0	0	0	0	0	0	0	0	0	0	0	5	0	0	0	0	1	0	0	0	0	1	0	0	0	0	0	0	7	1	0	0
'SIPS G1 SLEEP DISTURBANCES T2'	2	1	2	0	0	0	0	0	0	0	0	0	0	0	0	0	0	0	0	0	0	0	0	0	0	3	0	0	3	0	1	0	0	0	0	0	0	6	0	0	0	0	0	0	0	0	0	0	0
'SIPS G2 DYSPHORIC MOOD T2'	0	0	0	0	0	0	0	0	0	0	0	0	0	0	0	0	0	0	0	0	0	0	2	0	0	0	0	0	0	0	0	0	0	0	0	0	0	0	0	0	0	1	0	0	0	0	0	0	0
'SIPS G3 MOTOR DISTURBANCES T2'	2	1	1	1	0	0	0	1	0	0	4	1	0	0	0	0	0	0	0	3	0	0	0	1	2	0	0	0	3	1	1	2	0	0	0	0	0	1	1	0	8	0	0	0	0	0	0	0	0
'SIPS G4 IMPAIRED TOLLERANCE TO STRESS T2'	7	5	0	4	11	0	0	0	0	0	26	0	0	0	0	0	0	7	7	3	0	11	16	10	13	0	0	0	6	4	5	5	0	0	3	0	0	5	4	5	7	1	0	7	0	0	1	0	0
'BPRS Anxiety T2'	0	0	0	0	0	0	0	0	0	0	8	0	0	0	0	0	0	9	11	0	0	0	0	0	0	1	0	0	0	0	0	0	10	0	0	0	0	1	0	0	0	0	0	0	0	0	0	0	0
'BPRS Bizarre Behaviour T2'	9	11	8	11	0	0	0	15	0	0	19	11	0	0	0	0	0	0	1	10	0	0	0	2	0	8	0	0	10	7	7	5	0	0	0	0	0	4	7	0	17	4	1	10	0	0	0	0	1
'BPRS Blunted Affect T2'	0	1	1	2	2	8	22	2	6	2	1	1	0	4	0	0	0	0	1	2	11	1	0	1	0	1	8	0	1	1	1	2	0	3	1	0	0	2	1	1	6	1	1	1	1	1	0	0	2
'BPRS Conceptual Disorganisation T2'	0	2	0	12	0	16	0	2	14	4	2	1	0	0	0	0	0	0	0	1	0	0	0	0	0	3	2	0	4	0	1	1	0	7	0	0	0	3	0	0	5	2	2	2	1	0	0	0	0
'BPRS Depression T2'	0	0	0	0	0	0	0	0	0	0	0	0	0	0	0	0	0	0	0	0	0	0	4	0	0	0	0	0	0	0	0	0	0	0	0	0	0	0	0	0	0	0	0	0	0	0	0	0	0
'BPRS Disorientation T2'	2	0	0	1	0	0	0	0	1	1	3	0	0	1	0	0	0	0	0	1	0	1	0	1	0	0	0	0	4	0	1	0	0	0	1	0	0	1	1	1	2	0	0	0	0	0	1	0	0
'BPRS Distractibility T2'	0	0	0	0	0	0	0	0	0	0	0	0	0	0	0	0	0	0	0	0	0	0	0	0	0	0	0	0	0	0	0	0	0	0	0	0	0	0	0	0	0	0	0	0	16	0	0	0	0
'BPRS Elevated Mood T2'	0	0	0	0	0	0	0	0	0	0	0	0	0	0	0	0	0	0	0	0	0	0	0	0	0	2	0	9	0	0	0	0	0	0	0	0	0	0	0	0	0	3	0	0	0	0	0	0	0
'BPRS Emotional Withdrawal T2'	0	0	0	2	1	1	1	5	1	1	1	1	0	1	0	0	0	0	0	2	1	1	0	1	0	1	1	0	0	0	1	1	0	5	1	0	0	1	1	1	7	0	0	0	1	0	0	0	0
'BPRS Excitement T2'	0	1	0	3	0	0	0	0	0	0	1	0	0	0	0	0	0	0	0	0	0	0	0	0	0	1	0	4	0	0	1	0	0	0	0	0	0	1	0	0	0	0	0	0	0	0	0	0	0
'BPRS Guilt T2'	0	0	0	0	0	0	0	0	0	0	0	0	0	0	0	0	0	6	0	0	0	0	0	0	0	0	0	0	0	0	0	0	0	0	0	0	0	7	0	0	0	0	0	0	0	0	0	0	0
'BPRS Hallucinations T2'	0	0	0	0	0	0	0	0	0	0	0	0	0	0	0	0	0	0	0	0	0	0	0	0	0	0	0	0	0	0	0	0	0	0	0	0	0	0	0	0	0	0	0	1	0	0	0	0	0
'BPRS Hostility T2'	0	0	0	13	0	0	0	0	0	0	0	0	0	0	0	0	0	0	0	0	0	0	0	0	0	1	0	0	5	0	0	0	0	0	0	0	0	0	0	0	0	0	0	0	0	0	0	0	0
'BPRS MAnnerisms T2'	1	1	1	1	0	0	0	3	1	0	5	3	0	0	0	0	0	0	0	2	0	1	0	6	0	1	1	4	7	3	2	3	0	4	1	0	0	1	4	3	7	4	0	0	1	0	0	0	2
'BPRS Motor Hyperactivity T2'	0	0	0	0	0	0	0	0	0	0	0	0	0	0	15	10	0	0	0	0	0	0	2	0	0	0	0	14	0	0	0	0	0	0	0	0	0	0	0	0	0	3	1	0	0	0	0	0	0
'BPRS Motor Retardation T2'	4	4	6	1	1	2	1	4	2	10	5	6	0	7	0	0	0	0	1	4	4	10	0	4	0	8	5	1	9	9	4	4	0	5	5	0	0	3	4	5	11	1	11	6	2	0	3	5	3
'BPRS Self neglect T2'	0	0	0	1	0	0	0	0	0	0	0	0	0	0	0	0	0	0	0	0	0	0	0	0	0	0	0	0	5	0	0	1	0	0	0	0	0	0	2	0	0	0	0	0	0	1	1	2	0
'BPRS Somatic T2'	0	0	0	7	0	0	0	0	0	0	0	0	0	0	0	0	16	4	0	0	0	0	0	0	0	0	0	0	3	0	0	0	0	0	0	0	4	0	0	0	0	4	0	1	13	0	0	0	0
'BPRS Suicidality T2'	0	0	0	0	0	0	0	0	0	0	0	0	0	0	0	0	0	0	0	0	0	0	0	12	0	0	0	0	0	0	0	0	0	0	0	0	0	0	0	0	0	0	0	2	0	0	0	0	0
'BPRS Suspiciouness T2'	0	1	0	1	0	0	0	0	0	0	0	0	0	0	0	0	0	0	0	0	0	0	0	0	0	1	0	0	0	0	0	0	0	0	0	0	0	12	0	0	2	0	3	0	1	0	0	0	0
'BPRS Tension T2'	0	0	4	4	1	0	0	0	0	0	2	0	0	0	0	0	0	0	3	3	0	0	0	0	0	0	0	0	0	3	1	1	0	1	0	0	0	2	0	0	4	0	0	0	0	0	0	0	0
'BPRS Uncooperativeness T2'	0	1	0	2	0	0	0	2	0	0	1	4	0	0	0	0	0	1	0	5	0	0	0	0	0	1	0	0	0	0	0	1	0	0	0	33	0	1	1	1	4	1	0	0	1	1	0	1	1
'BPRS Unsual Thought T2'	0	1	0	1	0	0	0	0	0	0	0	0	0	0	0	0	0	0	0	0	0	0	0	0	0	1	0	0	5	0	0	0	0	0	0	0	0	2	0	0	5	0	1	1	2	0	0	0	0
[truncated: 33 more columns]
