# Supplementary material for: Characterization and prediction of clinical pathways of vulnerability to psychosis through graph signal processing
Source: eLife. 2021 Sep 27;10:e59811. doi: 10.7554/eLife.59811 (PMC8476129; doi:10.7554/eLife.59811)
Supplement: Source data 2. [file elife-59811-data2.xlsx]

## Sheet: Adjecency Matrix in NEURAPRO
	'1.1 Unusual thought content'	'1.2 Non-bizarre ideas'	'1.3 Perceptual abnormalities'	'1.4 Disorganized speech'	'4.3 Anhedonia'	'4.2 Avolition/apathy'	'3.2 Blunted affect'	'3.1 Subjective emotional disturbance'	'2.2 Objective cognitive change'	'5.2 Impaired role functioning'	'5.3 Disorganized behavior'	'7.2 Depression'	'6.1 Subjective motor functioning'	'7.8 Impaired subjective tolerance to normal stress'	'2.1 Subjective cognitive change'	'BPRS Anxiety'	'BPRS Bizarre behaviour'	'BPRS Blunted affect'	'BPRS Conceptual disorganisation'	'BPRS Depression'	'BPRS Disorientation'	'BPRS Distractibility'	'BPRS Elated Mood'	'BPRS Emotional withdrawal'	'BPRS Excitement'	'BPRS Guilt'	'BPRS Hallucinations'	'BPRS Hostility'	'BPRS Mannerisms '	'BPRS Motor hyperactivity'	'BPRS Motor retardation'	'BPRS Self neglect'	'BPRS Somatic concern'	'BPRS Suicidality'	'BPRS Suspiciousness'	'BPRS Tension'	'BPRS Uncooperativeness'	'BPRS Unusual thought content'	'1.1 Unusual thought content T2'	'1.2 Non-bizarre ideas T2'	'1.3 Perceptual abnormalities T2'	'1.4 Disorganized speech T2'	'4.3 Anhedonia T2'	'4.2 Avolition/apathy T2'	'3.2 Blunted affect T2'	'3.1 Subjective emotional disturbance T2'	'2.2 Objective cognitive change T2'	'5.2 Impaired role functioning T2'	'5.3 Disorganized behavior T2'
'1.1 Unusual thought content'	0	0.273824	0.182432	0.195287	0.245773	0.240174	0	0	0	0	0	0.196993	0	0	0.243848	0	0	0	0.187606	0	0	0	0	0.173223	0.194804	0	0	0	0	0	0	0	0	0	0.186318	0	0	0.480339	0.233311	0	0	0	0	0	0	0	0	0	0
'1.2 Non-bizarre ideas'	0.273824	0	0.181493	0	0.217418	0	0	0	0	0.217651	0	0	0	0	0	0	0	0	0	0	0	0	0	0	0	0	0	0.171274	0	0	0	0.171053	0	0	0.414218	0	0	0.228795	0	0.222558	0	0	0	0	0	0	0	0	0
'1.3 Perceptual abnormalities'	0.182432	0.181493	0	0	0.219268	0	0	0	0	0	0	0	0	0	0	0	0	0	0	0.171292	0	0	0	0.186935	0.220153	0	0.479472	0	0	0	0	0	0	0	0	0	0	0	0	0	0	0	0	0	0	0	0	0	0
'1.4 Disorganized speech'	0.195287	0	0	0	0	0	0.260036	0	0.218912	0	0	0	0.20738	0.28919	0.266705	0.172627	0.28812	0.23204	0.413621	0	0	0.203383	0	0.218465	0	0.192418	0	0	0	0	0.231325	0	0	0	0	0	0	0.19822	0	0	0	0.186846	0	0	0	0	0	0	0.191295
'4.3 Anhedonia'	0.245773	0.217418	0.219268	0	0	0.739011	0.265289	0.451756	0	0.497508	0.224275	0.649768	0	0.418706	0.325098	0.255786	0	0.25415	0	0.570478	0	0	0	0.299651	0	0.328043	0.176398	0	0	0	0.199098	0.222472	0	0	0.231415	0.194211	0	0	0	0.191538	0	0	0.32049	0.289748	0.221708	0.249225	0	0.29355	0
'4.2 Avolition/apathy'	0.240174	0	0	0	0.739011	0	0.300315	0.470245	0.204793	0.566033	0.198891	0.638287	0.212264	0.334284	0.384626	0.282385	0.200866	0.271903	0	0.560824	0	0	0	0.239279	0	0.253116	0.207238	0.186324	0	0	0.257031	0.265606	0.185414	0.273997	0.19758	0.201549	0.192849	0.260666	0	0.225417	0.176677	0	0.309085	0.420857	0.21997	0.235653	0	0.387581	0
'3.2 Blunted affect'	0	0	0	0.260036	0.265289	0.300315	0	0.345897	0	0.254169	0	0.216712	0.218758	0.257649	0.277617	0	0.235494	0.840339	0.174343	0.222353	0	0	0	0.565944	0	0.333199	0	0	0	0	0.529957	0	0	0	0	0	0	0	0	0	0	0	0	0	0.397962	0	0	0.173949	0
'3.1 Subjective emotional disturbance'	0	0	0	0	0.451756	0.470245	0.345897	0	0	0.291669	0	0.342942	0.209179	0.321095	0.434465	0.331381	0	0.266987	0	0.334348	0	0	0	0.193729	0.185167	0	0	0.209757	0	0	0	0.198649	0	0	0.18789	0.223811	0	0	0	0	0	0	0.255303	0.351152	0	0.250134	0	0.263388	0
'2.2 Objective cognitive change'	0	0	0	0.218912	0	0.204793	0	0	0	0.288833	0	0	0.208917	0	0.332298	0.19893	0	0	0.349995	0	0.345577	0.445819	0	0	0.178761	0	0	0.40261	0	0	0	0.347969	0.238902	0.34675	0.211412	0.272694	0.336066	0	0	0.176903	0	0.236949	0	0.280573	0	0	0.307303	0.179713	0
'5.2 Impaired role functioning'	0	0.217651	0	0	0.497508	0.566033	0.254169	0.291669	0.288833	0	0.178501	0.32619	0	0.299677	0.330058	0.301722	0	0.23981	0	0.304976	0	0	0	0.231911	0	0	0	0.229229	0	0	0.205562	0.265916	0	0	0.306478	0.173356	0	0.220383	0	0	0	0	0.194112	0.275641	0	0	0	0.307204	0
'5.3 Disorganized behavior'	0	0	0	0	0.224275	0.198891	0	0	0	0.178501	0	0	0.231764	0.182813	0.235369	0	0.397846	0	0.260553	0	0	0	0	0	0.250117	0.170393	0	0.2492	0.265673	0	0	0.35697	0	0	0	0.19626	0.175136	0	0	0	0	0	0	0	0	0	0	0	0.272787
'7.2 Depression'	0.196993	0	0	0	0.649768	0.638287	0.216712	0.342942	0	0.32619	0	0	0	0.220148	0.307544	0.204516	0	0.203677	0	0.607583	0	0	0	0	0	0.200968	0.172681	0.17495	0	0	0.17613	0.23333	0	0.28076	0.233839	0	0	0	0	0	0	0	0.227165	0.248945	0	0	0	0.216599	0
'6.1 Subjective motor functioning'	0	0	0	0.20738	0	0.212264	0.218758	0.209179	0.208917	0	0.231764	0	0	0	0.320325	0.192707	0	0	0	0	0	0	0.184489	0	0.198724	0.190384	0	0	0.191858	0	0.236594	0	0.177494	0	0	0	0	0	0	0	0.229475	0	0	0.212218	0	0	0	0	0
'7.8 Impaired subjective tolerance to normal stress'	0	0	0	0.28919	0.418706	0.334284	0.257649	0.321095	0	0.299677	0.182813	0.220148	0	0	0.32539	0.2487	0.182774	0.343034	0.351424	0.413269	0	0	0	0.359159	0	0.308767	0.177057	0.177705	0	0	0.278338	0.173285	0	0.224257	0	0	0	0	0	0	0	0	0.299514	0	0.177495	0.171682	0	0	0
'2.1 Subjective cognitive change'	0.243848	0	0	0.266705	0.325098	0.384626	0.277617	0.434465	0.332298	0.330058	0.235369	0.307544	0.320325	0.32539	0	0.345574	0	0.305999	0.29453	0.311705	0.175407	0.203253	0	0.196401	0.220312	0	0	0.320936	0	0.231072	0	0.217348	0	0.240882	0.28686	0.208177	0.274815	0.172139	0	0	0	0	0	0.288565	0	0	0.200113	0	0.176435
'BPRS Anxiety'	0	0	0	0.172627	0.255786	0.282385	0	0.331381	0.19893	0.301722	0	0.204516	0.192707	0.2487	0.345574	0	0.199552	0	0	0.283135	0	0	0	0	0	0.246097	0	0.218662	0	0	0	0.288489	0.279142	0.226766	0.260976	0.262515	0	0	0	0	0	0.207226	0	0.18434	0	0	0.220805	0.270247	0
'BPRS Bizarre behaviour'	0	0	0	0.28812	0	0.200866	0.235494	0	0	0	0.397846	0	0	0.182774	0	0.199552	0	0.252944	0.391198	0.196077	0	0.18001	0	0.328541	0.373616	0.242387	0	0.226699	0.265453	0.223902	0	0.192349	0.306252	0.231342	0	0.229701	0.221159	0.280773	0	0	0	0.254284	0	0	0	0	0	0	0.29067
'BPRS Blunted affect'	0	0	0	0.23204	0.25415	0.271903	0.840339	0.266987	0	0.23981	0	0.203677	0	0.343034	0.305999	0	0.252944	0	0.217713	0.273181	0	0.213701	0	0.676114	0	0.317641	0	0	0	0	0.606621	0	0	0	0	0.173555	0	0.179089	0	0	0	0	0	0	0.424784	0	0	0	0
'BPRS Conceptual disorganisation'	0.187606	0	0	0.413621	0	0	0.174343	0	0.349995	0	0.260553	0	0	0.351424	0.29453	0	0.391198	0.217713	0	0	0	0.342787	0	0.270291	0.305448	0.200001	0	0.245005	0	0.282613	0	0.324178	0	0.218386	0	0.220215	0.239529	0	0	0	0	0	0	0	0	0	0	0	0.219858
'BPRS Depression'	0	0	0.171292	0	0.570478	0.560824	0.222353	0.334348	0	0.304976	0	0.607583	0	0.413269	0.311705	0.283135	0.196077	0.273181	0	0	0.179216	0	0	0.345449	0	0.310481	0.172861	0.25662	0	0	0.235991	0.247238	0	0.434737	0.240427	0.177999	0	0.236157	0	0	0	0	0.274606	0.249878	0	0.175024	0	0	0
'BPRS Disorientation'	0	0	0	0	0	0	0	0	0.345577	0	0	0	0	0	0.175407	0	0	0	0	0.179216	0	0	0	0	0	0	0	0.369131	0.202087	0	0	0	0	0.211586	0	0.259469	0.317936	0	0	0	0	0	0	0	0	0	0	0	0
'BPRS Distractibility'	0	0	0	0.203383	0	0	0	0	0.445819	0	0	0	0	0	0.203253	0	0.18001	0.213701	0.342787	0	0	0	0	0.185802	0.373865	0	0	0.280283	0	0.207813	0	0	0	0	0	0.428795	0.272023	0	0	0	0	0	0	0	0	0	0	0	0
'BPRS Elated Mood'	0	0	0	0	0	0	0	0	0	0	0	0	0.184489	0	0	0	0	0	0	0	0	0	0	0	0.201295	0	0	0.223288	0	0	0	0	0	0	0	0	0	0	0	0	0	0	0	0	0	0	0	0	0
'BPRS Emotional withdrawal'	0.173223	0	0.186935	0.218465	0.299651	0.239279	0.565944	0.193729	0	0.231911	0	0	0	0.359159	0.196401	0	0.328541	0.676114	0.270291	0.345449	0	0.185802	0	0	0.250624	0.25954	0	0	0	0	0.459499	0	0	0	0	0.266359	0	0.259505	0	0	0	0	0	0	0.420188	0	0	0	0
'BPRS Excitement'	0.194804	0	0.220153	0	0	0	0	0.185167	0.178761	0	0.250117	0	0.198724	0	0.220312	0	0.373616	0	0.305448	0	0	0.373865	0.201295	0.250624	0	0	0	0.247011	0.278729	0.495648	0	0	0.171249	0.184929	0	0.459899	0	0	0	0	0	0	0	0	0	0	0	0	0
'BPRS Guilt'	0	0	0	0.192418	0.328043	0.253116	0.333199	0	0	0	0.170393	0.200968	0.190384	0.308767	0	0.246097	0.242387	0.317641	0.200001	0.310481	0	0	0	0.25954	0	0	0	0	0	0	0.245021	0.180411	0	0.16951	0	0	0	0.206305	0	0	0.169644	0	0.202397	0	0.173177	0.2173	0	0.205957	0
'BPRS Hallucinations'	0	0	0.479472	0	0.176398	0.207238	0	0	0	0	0	0.172681	0	0.177057	0	0	0	0	0	0.172861	0	0	0	0	0	0	0	0	0	0	0	0.21915	0.177659	0	0.230943	0	0	0.275683	0	0	0	0	0	0	0	0	0	0	0
'BPRS Hostility'	0	0.171274	0	0	0	0.186324	0	0.209757	0.40261	0.229229	0.2492	0.17495	0	0.177705	0.320936	0.218662	0.226699	0	0.245005	0.25662	0.369131	0.280283	0.223288	0	0.247011	0	0	0	0	0	0	0.355042	0	0.430168	0.350845	0.3582	0.455124	0	0.216596	0.239743	0	0	0	0.208131	0	0	0	0	0
'BPRS Mannerisms '	0	0	0	0	0	0	0	0	0	0	0.265673	0	0.191858	0	0	0	0.265453	0	0	0	0.202087	0	0	0	0.278729	0	0	0	0	0	0	0	0.248249	0	0	0.278911	0.278264	0.203731	0	0	0	0	0	0	0	0	0	0	0
'BPRS Motor hyperactivity'	0	0	0	0	0	0	0	0	0	0	0	0	0	0	0.231072	0	0.223902	0	0.282613	0	0	0.207813	0	0	0.495648	0	0	0	0	0	0	0	0	0	0	0.302821	0	0	0	0	0	0	0	0	0	0	0	0	0
'BPRS Motor retardation'	0	0	0	0.231325	0.199098	0.257031	0.529957	0	0	0.205562	0	0.17613	0.236594	0.278338	0	0	0	0.606621	0	0.235991	0	0	0	0.459499	0	0.245021	0	0	0	0	0	0	0	0	0	0	0	0.262136	0	0	0	0	0	0	0.28266	0	0	0	0
'BPRS Self neglect'	0	0.171053	0	0	0.222472	0.265606	0	0.198649	0.347969	0.265916	0.35697	0.23333	0	0.173285	0.217348	0.288489	0.192349	0	0.324178	0.247238	0	0	0	0	0	0.180411	0.21915	0.355042	0	0	0	0	0.217852	0.224079	0.296945	0.176609	0.205926	0.194456	0.195297	0.179205	0.202652	0	0	0	0	0	0.173733	0.255094	0.176623
'BPRS Somatic concern'	0	0	0	0	0	0.185414	0	0	0.238902	0	0	0	0.177494	0	0	0.279142	0.306252	0	0	0	0	0	0	0	0.171249	0	0.177659	0	0.248249	0	0	0.217852	0	0	0	0	0	0	0	0	0.169608	0	0	0.183149	0	0	0	0	0
'BPRS Suicidality'	0	0	0	0	0	0.273997	0	0	0.34675	0	0	0.28076	0	0.224257	0.240882	0.226766	0.231342	0	0.218386	0.434737	0.211586	0	0	0	0.184929	0.16951	0	0.430168	0	0	0	0.224079	0	0	0	0.189398	0	0	0	0.173994	0	0	0.199542	0.308396	0	0.203681	0	0	0
'BPRS Suspiciousness'	0.186318	0.414218	0	0	0.231415	0.19758	0	0.18789	0.211412	0.306478	0	0.233839	0	0	0.28686	0.260976	0	0	0	0.240427	0	0	0	0	0	0	0.230943	0.350845	0	0	0	0.296945	0	0	0	0.185144	0.207602	0.280821	0	0	0	0	0	0	0	0	0	0	0
'BPRS Tension'	0	0	0	0	0.194211	0.201549	0	0.223811	0.272694	0.173356	0.19626	0	0	0	0.208177	0.262515	0.229701	0.173555	0.220215	0.177999	0.259469	0.428795	0	0.266359	0.459899	0	0	0.3582	0.278911	0.302821	0	0.176609	0	0.189398	0.185144	0	0.245587	0.198106	0	0	0	0	0	0.175542	0	0	0	0.189411	0
'BPRS Uncooperativeness'	0	0	0	0	0	0.192849	0	0	0.336066	0	0.175136	0	0	0	0.274815	0	0.221159	0	0.239529	0	0.317936	0.272023	0	0	0	0	0	0.455124	0.278264	0	0	0.205926	0	0	0.207602	0.245587	0	0	0.260933	0	0	0	0	0.238621	0	0	0	0.17267	0.262685
'BPRS Unusual thought content'	0.480339	0.228795	0	0.19822	0	0.260666	0	0	0	0.220383	0	0	0	0	0.172139	0	0.280773	0.179089	0	0.236157	0	0	0	0.259505	0	0.206305	0.275683	0	0.203731	0	0.262136	0.194456	0	0	0.280821	0.198106	0	0	0.222497	0	0	0	0	0	0	0	0	0	0
'1.1 Unusual thought content T2'	0.233311	0	0	0	0	0	0	0	0	0	0	0	0	0	0	0	0	0	0	0	0	0	0	0	0	0	0	0.216596	0	0	0	0.195297	0	0	0	0	0.260933	0.222497	0	0.2394	0	0	0	0	0	0.185844	0	0	0
'1.2 Non-bizarre ideas T2'	0	0.222558	0	0	0.191538	0.225417	0	0	0.176903	0	0	0	0	0	0	0	0	0	0	0	0	0	0	0	0	0	0	0.239743	0	0	0	0.179205	0	0.173994	0	0	0	0	0.2394	0	0.309672	0.228741	0.315173	0.328193	0.22544	0.285955	0	0.27625	0.192744
'1.3 Perceptual abnormalities T2'	0	0	0	0	0	0.176677	0	0	0	0	0	0	0.229475	0	0	0	0	0	0	0	0	0	0	0	0	0.169644	0	0	0	0	0	0.202652	0.169608	0	0	0	0	0	0	0.309672	0	0.170731	0	0.259024	0	0.223274	0	0	0.191305
'1.4 Disorganized speech T2'	0	0	0	0.186846	0	0	0	0	0.236949	0	0	0	0	0	0	0.207226	0.254284	0	0	0	0	0	0	0	0	0	0	0	0	0	0	0	0	0	0	0	0	0	0	0.228741	0.170731	0	0	0.262369	0.213621	0.221006	0.282322	0	0.204867
'4.3 Anhedonia T2'	0	0	0	0	0.32049	0.309085	0	0.255303	0	0.194112	0	0.227165	0	0.299514	0	0	0	0	0	0.274606	0	0	0	0	0	0.202397	0	0	0	0	0	0	0	0.199542	0	0	0	0	0	0.315173	0	0	0	0.629589	0.256343	0.549775	0	0.372273	0
'4.2 Avolition/apathy T2'	0	0	0	0	0.289748	0.420857	0	0.351152	0.280573	0.275641	0	0.248945	0.212218	0	0.288565	0.18434	0	0	0	0.249878	0	0	0	0	0	0	0	0.208131	0	0	0	0	0.183149	0.308396	0	0.175542	0.238621	0	0	0.328193	0.259024	0.262369	0.629589	0	0	0.44836	0.223277	0.533504	0
'3.2 Blunted affect T2'	0	0	0	0	0.221708	0.21997	0.397962	0	0	0	0	0	0	0.177495	0	0	0	0.424784	0	0	0	0	0	0.420188	0	0.173177	0	0	0	0	0.28266	0	0	0	0	0	0	0	0	0.22544	0	0.213621	0.256343	0	0	0.348362	0.291502	0.187098	0
'3.1 Subjective emotional disturbance T2'	0	0	0	0	0.249225	0.235653	0	0.250134	0	0	0	0	0	0.171682	0	0	0	0	0	0.175024	0	0	0	0	0	0.2173	0	0	0	0	0	0	0	0.203681	0	0	0	0	0.185844	0.285955	0.223274	0.221006	0.549775	0.44836	0.348362	0	0	0.272592	0.194548
'2.2 Objective cognitive change T2'	0	0	0	0	0	0	0	0	0.307303	0	0	0	0	0	0.200113	0.220805	0	0	0	0	0	0	0	0	0	0	0	0	0	0	0	0.173733	0	0	0	0	0	0	0	0	0	0.282322	0	0.223277	0.291502	0	0	0.308998	0.295099
'5.2 Impaired role functioning T2'	0	0	0	0	0.29355	0.387581	0.173949	0.263388	0.179713	0.307204	0	0.216599	0	0	0	0.270247	0	0	0	0	0	0	0	0	0	0.205957	0	0	0	0	0	0.255094	0	0	0	0.189411	0.17267	0	0	0.27625	0	0	0.372273	0.533504	0.187098	0.272592	0.308998	0	0.278026
'5.3 Disorganized behavior T2'	0	0	0	0.191295	0	0	0	0	0	0	0.272787	0	0	0	0.176435	0	0.29067	0	0.219858	0	0	0	0	0	0	0	0	0	0	0	0	0.176623	0	0	0	0	0.262685	0	0	0.192744	0.191305	0.204867	0	0	0	0.194548	0.295099	0.278026	0
'7.2 Depression T2'	0	0	0	0	0.294609	0.351999	0	0.258724	0.186307	0.186488	0	0.301368	0.169863	0.245025	0.212215	0.212073	0	0	0	0.412469	0	0	0	0	0	0.240293	0	0.184746	0	0	0	0	0	0.306375	0	0	0	0	0.188216	0.40528	0.289249	0	0.662767	0.553452	0.173837	0.42522	0	0.356976	0
'6.1 Subjective motor functioning T2'	0	0	0	0	0	0	0	0	0	0	0	0	0	0	0	0	0	0	0	0	0	0	0	0	0	0	0	0	0	0	0	0	0	0	0	0	0	0	0	0	0.193489	0	0	0.205183	0	0	0	0	0
'7.8 Impaired subjective tolerance to normal stress T2'	0	0	0	0	0.273008	0.225806	0.215422	0	0	0	0	0	0	0.391378	0	0	0	0.254778	0.234099	0.218177	0	0	0	0.237137	0	0.319924	0	0	0	0	0.21375	0	0.179299	0	0	0	0	0.192808	0.198836	0.251309	0.254764	0.18227	0.467279	0.369423	0.278582	0.365527	0	0.295282	0.228294
'2.1 Subjective cognitive change T2'	0	0	0	0.172651	0	0	0	0.175599	0.314429	0	0	0	0.224349	0	0.237011	0.212888	0	0	0	0	0	0	0	0	0	0	0	0	0	0	0	0	0	0.185757	0	0	0	0	0	0.355818	0.319859	0.36377	0.400621	0.523841	0.227566	0.363746	0.385817	0.362809	0
'BPRS Anxiety T2'	0	0	0	0	0.251067	0.282524	0	0.206164	0.218838	0.228946	0.170942	0	0	0	0.194892	0.444858	0	0	0	0	0	0	0	0	0	0	0	0.326049	0	0	0	0.350705	0.177698	0.216453	0.192084	0.231084	0	0	0	0.447398	0.240968	0.196154	0.339608	0.448902	0	0.229231	0.306071	0.496681	0.229498
'BPRS Bizarre behaviour T2'	0	0	0	0.202688	0	0	0	0	0	0	0.325579	0	0	0	0	0	0.363325	0	0.232723	0	0	0	0	0	0	0	0	0	0	0	0	0.19483	0	0	0	0	0	0	0	0.178307	0	0.232769	0	0	0.173275	0	0.347328	0.245805	0.801533
'BPRS Blunted affect T2'	0	0	0	0	0.231505	0.260586	0.428425	0	0	0	0	0	0	0	0	0	0.249441	0.46766	0	0.193652	0	0.188002	0	0.424138	0	0	0	0	0	0	0.331827	0	0	0	0	0	0	0	0	0.171549	0	0.193052	0.270564	0.247097	0.827818	0.319717	0.192651	0.24759	0.247651
'BPRS Conceptual disorganisation T2'	0	0	0	0	0	0	0	0	0.212795	0	0.217043	0	0	0	0	0.193639	0.376843	0	0.344511	0	0	0	0	0	0.3078	0	0	0.309794	0	0.285406	0	0	0	0.224793	0	0.17867	0	0	0.230766	0.289531	0	0.345111	0	0	0	0	0	0	0.191879
'BPRS Depression T2'	0	0	0	0	0.289551	0.312734	0	0.22443	0.191649	0.207501	0	0.275842	0	0.295761	0.190563	0.268213	0	0	0	0.382428	0	0	0	0	0	0.182555	0	0.240589	0	0	0	0	0	0.36182	0.173974	0	0.182415	0	0.185135	0.423017	0.218505	0	0.678432	0.575404	0.255768	0.461521	0	0.39086	0
'BPRS Disorientation T2'	0	0	0	0	0	0	0	0	0	0	0	0	0	0	0	0	0	0	0	0	0.280571	0	0	0	0	0	0	0	0	0	0	0	0	0	0	0	0	0	0	0	0	0	0	0	0	0	0	0	0
'BPRS Distractibility T2'	0	0	0	0	0	0	0	0	0.194075	0	0	0	0	0	0	0	0	0	0	-0.178161	0	0.17697	0	0	0	0	0	0	0	0	0	0	0	0	0	0	0	0	0	0	0	0	0	0	0	0	0.529968	0.185553	0
'BPRS Elated Mood T2'	0	0	0	0	0	0	0	0	0	0	0	0	0	0	0	0	0.20813	0	0	0	0	0	0	0	0	0	0	0	0	0	0	0	0	0	0.18541	0	0	0	0	0	0	0	0	0	0	0	0	0	0
'BPRS Emotional withdrawal T2'	0	0	0	0	0.211289	0.267045	0.27094	0.185596	0.192402	0.175009	0	0	0	0	0	0	0.293657	0.331321	0.185939	0	0	0.224858	0	0.384796	0.231566	0	0	0	0	0	0	0	0.213274	0.247738	0	0	0.227498	0	0	0	0	0	0.289305	0.299633	0.57804	0.268898	0	0.236624	0.253438
'BPRS Excitement T2'	0	0	0	0	0	0	0	0	0.22421	0	0	0	0	0	0.200955	0	0.276559	0	0.297374	0	0	0	0	0	0.398472	0	0	0.235932	0	0.471661	0	0	0	0.262458	0	0.248422	0.18285	0	0	0	0	0	0	0.173837	0	0	0	0	0
'BPRS Guilt T2'	0	0	0	0	0.235373	0.225024	0	0	0	0	0	0.174515	0	0.201868	0	0.197503	0.212071	0	0.191465	0.247274	0.201584	0.220874	0	0.210178	0.255355	0.20865	0	0.275767	0	0	0	0	0	0.32006	0	0.238405	0.265961	0	0.22504	0.358313	0	0.201824	0.278246	0.247833	0.238928	0.264835	0	0.220967	0
'BPRS Hallucinations T2'	0	0	0	0	0	0	0	0	0.194974	0	0	0	0	0	0	0	0	0	0.181396	0	0	0.180182	0	0	0	0	0	0.314754	0	0	0	0.2567	0	0.190063	0	0	0.238063	0	0	0.374611	0.726831	0	0	0.313864	0	0.234409	0.187924	0.207779	0.28521
'BPRS Hostility T2'	0	0	0	0	0	0.191246	0	0	0.236715	0	0	0.247404	0.226071	0.195199	0.273722	0.197994	0	0	0	0.24407	0	0	0	0	0	0	0	0.551753	0	0	0	0.266766	0	0.361491	0.338831	0	0.200977	0	0	0.298179	0	0	0.264737	0.34104	0	0.221207	0.216243	0.211596	0
'BPRS Mannerisms T2'	0	0	0.17027	0	0	0	0	0	0	0	-0.173039	0	0	0	0	0	0	0	0	0	0	0	0	0	0	0	0	0	0	0	0	0	0	0	0	0	0	0	-0.182779	0	0	0	0	0	0	0	0	0	0
'BPRS Motor hyperactivity T2'	0	0	0	0	0	0	0	0	0.225274	0	0	0	0	0	0	0	0	0	0	0	0	0.206777	0	0	0	0	0	0	0	0.182238	0	0	0	0	0	0	0	0	0	0	0	0	0	0	0	0	0.208804	0	0
'BPRS Motor retardation T2'	0	0	0	0	0	0	0	0	0	0	0	0	0	0	0	0	0	0	0	0	0	0	0	0.207947	0	0	0	0	0	0	0.216193	0	0	0	0	0	0	0	0	0.170024	0	0	0	0.209109	0.188785	0.205769	0	0	0
'BPRS Self neglect T2'	0	0	0	0	0.186021	0.235956	0	0	0.270461	0.196204	0.400805	0.229482	0	0	0.205683	0	0	0	0	0	0.191082	0	0	0	0	0	0	0.27864	0	0	0	0.397198	0	0.205436	0	0	0.249256	0	0	0.208658	0.226694	0	0.216086	0.387804	0	0.173754	0.27859	0.426156	0.374195
'BPRS Somatic concern T2'	0	0	0	0	0	0	0	0	0	0	0	0	0.288429	0	0	0.196296	0	0	0	0	0	0	0	0	0	0	0	0	0	0	0	0	0.379892	0	0	0.181923	0	0	0	0	0.179529	0	0.225746	0.33308	0	0	0	0.203734	0
'BPRS Suicidality T2'	0	0	0	0	0.212659	0.245379	0	0	0.177287	0	0	0.254159	0	0.253681	0.207775	0.179006	0	0	0.188546	0.319835	0	0	0	0.177348	0	0.199906	0	0.283837	0	0	0	0	0	0.440139	0.182441	0	0	0	0	0.275212	0	0.176332	0.498581	0.392202	0.189839	0.436187	0	0.212719	0
'BPRS Suspiciousness T2'	0	0	0	0	0.208728	0.246841	0	0	0.238254	0.170492	0.188998	0.231405	0	0	0.198719	0.219465	0	0	0	0.211784	0	0	0	0	0	0	0	0.301202	0	0	0	0.33217	0	0.205898	0.194844	0	0	0	0.194304	0.665654	0.276975	0	0.211192	0.263717	0	0.222242	0	0.259137	0.320709
'BPRS Tension T2'	0	0.178639	0	0	0	0	0	0.239844	0.173628	0	0	0	0	0	0.193838	0.202148	0	0	0	0.173177	0.177957	0.171734	0	0	0.222392	0	0	0.193581	0	0	0	0.198013	0	0	0.185341	0.383343	0	0	0	0.216308	0	0	0.248185	0.282043	0	0	0	0.342579	0
'BPRS Uncooperativeness T2'	0	0	0	0	0	0	0	0	0	0.204603	0	0	0	0	0	0	0	0	0	0	0.198717	0	0	0	0	0	0	0	0	0	0	0	0	0	0	0	0.303098	0	0.31898	0	0	0	0	0	0	0	0	0	0
'BPRS Unusual thought content T2'	0	0	0	0	0	0	0	0	0.279566	0.196567	0	0	0	0	0	0.215988	0	0	0	0	0.228663	0	0	0	0.19583	0	0	0.332386	0	0	0	0.220112	0	0.196197	0	0	0.275013	0	0.544099	0.585977	0	0.235458	0.172348	0.208238	0	0	0	0.316829	0
[truncated: 27 more columns]

## Sheet: Symptom Loading in MTSN
	Symptoms Loading According to First Cross-Sectional Network Dimension	Symptoms Loading According to Second Longitudinal Network Dimension
'1.1 Unusual thought content'	0.020389	-0.0595453
'1.2 Non-bizarre ideas'	-0.000324673	-0.00711159
'1.3 Perceptual abnormalities'	0.0226387	-0.0356311
'1.4 Disorganized speech'	0.0380353	-0.0790877
'4.3 Anhedonia'	-0.155647	-0.237116
'4.2 Avolition/apathy'	-0.174429	-0.210359
'3.2 Blunted affect'	-0.00598848	-0.302622
'3.1 Subjective emotional disturbance'	-0.126321	-0.150839
'2.2 Objective cognitive change'	-0.0563879	0.123678
'5.2 Impaired role functioning'	-0.108869	-0.138883
'5.3 Disorganized behavior'	-0.00649511	0.00966973
'7.2 Depression'	-0.151706	-0.162863
'6.1 Subjective motor functioning'	-0.0111081	-0.0239066
'7.8 Impaired subjective tolerance to normal stress'	-0.0891124	-0.213183
'2.1 Subjective cognitive change'	-0.0632256	-0.0767219
'BPRS Anxiety'	-0.115784	-0.0102785
'BPRS Bizarre behaviour'	0.0736514	-0.0592837
'BPRS Blunted affect'	0.00972904	-0.321197
'BPRS Conceptual disorganisation'	0.04667	-0.0267469
'BPRS Depression'	-0.148883	-0.214996
'BPRS Disorientation'	-0.00256501	0.0502511
'BPRS Distractibility'	0.0378081	0.00105903
'BPRS Elated Mood'	0.00472118	0.00777509
'BPRS Emotional withdrawal'	0.0222003	-0.288197
'BPRS Excitement'	0.0749341	0.0223846
'BPRS Guilt'	-0.0627428	-0.17251
'BPRS Hallucinations'	0.00192155	-0.0498336
'BPRS Hostility'	-0.0838758	0.103685
'BPRS Mannerisms '	0.0395377	0.0102802
'BPRS Motor hyperactivity'	0.0479657	0.0199494
'BPRS Motor retardation'	0.00611215	-0.24047
'BPRS Self neglect'	-0.0635631	0.0467775
'BPRS Somatic concern'	-0.00736499	0.00586121
'BPRS Suicidality'	-0.148917	0.0282494
'BPRS Suspiciousness'	-0.0479474	-0.0175933
'BPRS Tension'	0.01321	-0.00467262
'BPRS Uncooperativeness'	-0.0169536	0.0765366
'BPRS Unusual thought content'	0.033456	-0.100425
'1.1 Unusual thought content T2'	-0.0429576	0.0552129
'1.2 Non-bizarre ideas T2'	-0.1982	0.133698
'1.3 Perceptual abnormalities T2'	-0.098625	0.0808555
'1.4 Disorganized speech T2'	-0.0492607	0.0584822
'4.3 Anhedonia T2'	-0.269191	-0.045182
'4.2 Avolition/apathy T2'	-0.254518	0.0525306
'3.2 Blunted affect T2'	-0.0750393	-0.179156
'3.1 Subjective emotional disturbance T2'	-0.205094	-0.0166585
'2.2 Objective cognitive change T2'	-0.0428292	0.0864102
'5.2 Impaired role functioning T2'	-0.203885	0.0338567
'5.3 Disorganized behavior T2'	-0.026316	0.0775065
'7.2 Depression T2'	-0.288872	-0.00488713
'6.1 Subjective motor functioning T2'	-0.0163676	0.0141522
'7.8 Impaired subjective tolerance to normal stress T2'	-0.15037	-0.089289
'2.1 Subjective cognitive change T2'	-0.171716	0.121994
'BPRS Anxiety T2'	-0.223573	0.14281
'BPRS Bizarre behaviour T2'	-0.0110955	0.0839718
'BPRS Blunted affect T2'	-0.0814518	-0.178491
'BPRS Conceptual disorganisation T2'	-0.00993761	0.105339
'BPRS Depression T2'	-0.303025	0.016127
'BPRS Disorientation T2'	0.0054625	0.00572543
'BPRS Distractibility T2'	0.00131007	0.0809563
'BPRS Elated Mood T2'	0.0122796	0.00250883
'BPRS Emotional withdrawal T2'	-0.0629878	-0.13318
'BPRS Excitement T2'	0.0259525	0.0593404
'BPRS Guilt T2'	-0.113579	-0.00647114
'BPRS Hallucinations T2'	-0.136767	0.152112
'BPRS Hostility T2'	-0.183813	0.0895581
'BPRS Mannerisms T2'	0.0342514	0.0142924
'BPRS Motor hyperactivity T2'	0.0524919	0.0552146
'BPRS Motor retardation T2'	0.0102795	-0.0094337
'BPRS Self neglect T2'	-0.147064	0.122774
'BPRS Somatic concern T2'	-0.0604354	0.00453958
'BPRS Suicidality T2'	-0.229077	-0.00257576
'BPRS Suspiciousness T2'	-0.20438	0.109381
'BPRS Tension T2'	-0.0635412	0.0969618
'BPRS Uncooperativeness T2'	-0.00397333	0.0246692
'BPRS Unusual thought content T2'	-0.127831	0.156808

## Sheet: Shortest Longitudinal Paths
	'1.1 Unusual thought content'	'1.2 Non-bizarre ideas'	'1.3 Perceptual abnormalities'	'1.4 Disorganized speech'	'4.3 Anhedonia'	'4.2 Avolition/apathy'	'3.2 Blunted affect'	'3.1 Subjective emotional disturbance'	'2.2 Objective cognitive change'	'5.2 Impaired role functioning'	'5.3 Disorganized behavior'	'7.2 Depression'	'6.1 Subjective motor functioning'	'7.8 Impaired subjective tolerance to normal stress'	'2.1 Subjective cognitive change'	'BPRS Anxiety'	'BPRS Bizarre behaviour'	'BPRS Blunted affect'	'BPRS Conceptual disorganisation'	'BPRS Depression'	'BPRS Disorientation'	'BPRS Distractibility'	'BPRS Elated Mood'	'BPRS Emotional withdrawal'	'BPRS Excitement'	'BPRS Guilt'	'BPRS Hallucinations'	'BPRS Hostility'	'BPRS Mannerisms '	'BPRS Motor hyperactivity'	'BPRS Motor retardation'	'BPRS Self neglect'	'BPRS Somatic concern'	'BPRS Suicidality'	'BPRS Suspiciousness'	'BPRS Tension'	'BPRS Uncooperativeness'	'BPRS Unusual thought content'	'1.1 Unusual thought content T2'	'1.2 Non-bizarre ideas T2'	'1.3 Perceptual abnormalities T2'	'1.4 Disorganized speech T2'	'4.3 Anhedonia T2'	'4.2 Avolition/apathy T2'	'3.2 Blunted affect T2'	'3.1 Subjective emotional disturbance T2'	'2.2 Objective cognitive change T2'	'5.2 Impaired role functioning T2'	'5.3 Disorganized behavior T2'
'1.1 Unusual thought content'	0	2	1	0	1	8	0	0	0	0	0	0	0	0	4	0	0	0	1	0	0	0	0	0	1	0	0	0	0	0	0	0	0	0	0	0	0	3	3	0	0	0	0	0	0	0	0	0	0
'1.2 Non-bizarre ideas'	2	0	0	0	2	0	0	0	0	1	0	0	0	0	0	0	0	0	0	0	0	0	0	0	0	0	0	0	0	0	0	0	0	0	6	0	0	0	0	10	0	0	0	0	0	0	0	0	0
'1.3 Perceptual abnormalities'	1	0	0	0	5	0	0	0	0	0	0	0	0	0	0	0	0	0	0	1	0	0	0	2	8	0	8	0	0	0	0	0	0	0	0	0	0	0	0	0	0	0	0	0	0	0	0	0	0
'1.4 Disorganized speech'	0	0	0	0	0	0	1	0	3	0	0	0	1	2	1	1	2	0	5	0	0	0	0	0	0	0	0	0	0	0	2	0	0	0	0	0	0	0	0	0	0	0	0	0	0	0	0	0	0
'4.3 Anhedonia'	1	2	5	0	0	0	0	1	0	3	0	1	0	0	0	0	0	0	0	2	0	0	0	1	0	1	0	0	0	0	0	0	0	0	2	0	0	0	0	0	0	0	0	5	0	0	0	4	0
'4.2 Avolition/apathy'	8	0	0	0	0	0	3	1	0	6	0	10	0	0	0	1	0	2	0	1	0	0	0	0	0	0	7	0	0	0	3	2	0	1	0	0	0	4	0	0	0	0	0	15	0	0	0	8	0
'3.2 Blunted affect'	0	0	0	1	0	3	0	2	0	0	0	0	1	0	2	0	3	0	0	0	0	0	0	0	0	0	0	0	0	0	3	0	0	0	0	0	0	0	0	0	0	0	0	0	2	0	0	0	0
'3.1 Subjective emotional disturbance'	0	0	0	0	1	1	2	0	0	1	0	0	0	2	1	0	0	0	0	0	0	0	0	0	0	0	0	2	0	0	0	0	0	0	1	0	0	0	0	0	0	0	0	6	0	0	0	2	0
'2.2 Objective cognitive change'	0	0	0	3	0	0	0	0	0	3	0	0	3	0	0	0	0	0	3	0	15	6	0	0	0	0	0	3	0	0	0	0	6	4	0	0	4	0	0	0	0	1	0	4	0	0	10	0	0
'5.2 Impaired role functioning'	0	1	0	0	3	6	0	1	3	0	0	1	0	1	0	1	0	0	0	1	0	0	0	0	0	0	0	2	0	0	0	0	0	0	1	0	0	0	0	0	0	0	0	4	0	0	0	4	0
'5.3 Disorganized behavior'	0	0	0	0	0	0	0	0	0	0	0	0	3	0	0	0	7	0	0	0	0	0	0	0	2	0	0	2	2	0	0	0	0	0	0	0	0	0	0	0	0	0	0	0	0	0	0	0	0
'7.2 Depression'	0	0	0	0	1	10	0	0	0	1	0	0	0	0	0	0	0	0	0	3	0	0	0	0	0	0	0	0	0	0	0	0	0	1	1	0	0	0	0	0	0	0	0	0	0	0	0	0	0
'6.1 Subjective motor functioning'	0	0	0	1	0	0	1	0	3	0	3	0	0	0	1	0	0	0	0	0	0	0	1	0	3	0	0	0	0	0	2	0	0	0	0	0	0	0	0	0	1	0	0	1	0	0	0	0	0
'7.8 Impaired subjective tolerance to normal stress'	0	0	0	2	0	0	0	2	0	1	0	0	0	0	0	0	0	1	5	1	0	0	0	3	0	0	0	0	0	0	0	0	0	0	0	0	0	0	0	0	0	0	2	0	0	0	0	0	0
'2.1 Subjective cognitive change'	4	0	0	1	0	0	2	1	0	0	0	0	1	0	0	0	0	4	1	0	4	0	0	0	0	0	0	3	0	0	0	0	0	0	0	0	2	0	0	0	0	0	0	3	0	0	2	0	1
'BPRS Anxiety'	0	0	0	1	0	1	0	0	0	1	0	0	0	0	0	0	0	0	0	0	0	0	0	0	0	1	0	1	0	0	0	0	1	0	1	0	0	0	0	0	0	0	0	0	0	0	1	0	0
'BPRS Bizarre behaviour'	0	0	0	2	0	0	3	0	0	0	7	0	0	0	0	0	0	2	1	1	0	0	0	6	3	4	0	2	5	0	0	0	6	1	0	2	0	9	0	0	0	1	0	0	0	0	0	0	1
'BPRS Blunted affect'	0	0	0	0	0	2	0	0	0	0	0	0	0	1	4	0	2	0	0	0	0	0	0	1	0	2	0	0	0	0	3	0	0	0	0	0	0	0	0	0	0	0	0	0	2	0	0	0	0
'BPRS Conceptual disorganisation'	1	0	0	5	0	0	0	0	3	0	0	0	0	5	1	0	1	0	0	0	0	2	0	2	0	0	0	1	0	1	0	5	0	0	0	1	2	0	0	0	0	0	0	0	0	0	0	0	0
'BPRS Depression'	0	0	1	0	2	1	0	0	0	1	0	3	0	1	0	0	1	0	0	0	6	0	0	6	0	1	0	0	0	0	2	0	0	3	1	0	0	2	0	0	0	0	0	0	0	0	0	0	0
'BPRS Disorientation'	0	0	0	0	0	0	0	0	15	0	0	0	0	0	4	0	0	0	0	6	0	0	0	0	0	0	0	23	1	0	0	0	0	1	0	7	3	0	0	0	0	0	0	0	0	0	0	0	0
'BPRS Distractibility'	0	0	0	0	0	0	0	0	6	0	0	0	0	0	0	0	0	0	2	0	0	0	0	0	2	0	0	3	0	0	0	0	0	0	0	2	1	0	0	0	0	0	0	0	0	0	0	0	0
'BPRS Elated Mood'	0	0	0	0	0	0	0	0	0	0	0	0	1	0	0	0	0	0	0	0	0	0	0	0	8	0	0	15	0	0	0	0	0	0	0	0	0	0	0	0	0	0	0	0	0	0	0	0	0
'BPRS Emotional withdrawal'	0	0	2	0	1	0	0	0	0	0	0	0	0	3	0	0	6	1	2	6	0	0	0	0	1	2	0	0	0	0	2	0	0	0	0	6	0	2	0	0	0	0	0	0	2	0	0	0	0
'BPRS Excitement'	1	0	8	0	0	0	0	0	0	0	2	0	3	0	0	0	3	0	0	0	0	2	8	1	0	0	0	2	1	2	0	0	0	0	0	5	0	0	0	0	0	0	0	0	0	0	0	0	0
'BPRS Guilt'	0	0	0	0	1	0	0	0	0	0	0	0	0	0	0	1	4	2	0	1	0	0	0	2	0	0	0	0	0	0	0	0	0	0	0	0	0	0	0	0	0	0	0	0	0	0	0	3	0
'BPRS Hallucinations'	0	0	8	0	0	7	0	0	0	0	0	0	0	0	0	0	0	0	0	0	0	0	0	0	0	0	0	0	0	0	0	9	2	0	4	0	0	2	0	0	0	0	0	0	0	0	0	0	0
'BPRS Hostility'	0	0	0	0	0	0	0	2	3	2	2	0	0	0	3	1	2	0	1	0	23	3	15	0	2	0	0	0	0	0	0	2	0	2	9	6	10	0	0	0	0	0	0	0	0	0	0	0	0
'BPRS Mannerisms '	0	0	0	0	0	0	0	0	0	0	2	0	0	0	0	0	5	0	0	0	1	0	0	0	1	0	0	0	0	0	0	0	1	0	0	7	7	0	0	0	0	0	0	0	0	0	0	0	0
'BPRS Motor hyperactivity'	0	0	0	0	0	0	0	0	0	0	0	0	0	0	0	0	0	0	1	0	0	0	0	0	2	0	0	0	0	0	0	0	0	0	0	4	0	0	0	0	0	0	0	0	0	0	0	0	0
'BPRS Motor retardation'	0	0	0	2	0	3	3	0	0	0	0	0	2	0	0	0	0	3	0	2	0	0	0	2	0	0	0	0	0	0	0	0	0	0	0	0	0	3	0	0	0	0	0	0	2	0	0	0	0
'BPRS Self neglect'	0	0	0	0	0	2	0	0	0	0	0	0	0	0	0	0	0	0	5	0	0	0	0	0	0	0	9	2	0	0	0	0	1	0	4	0	0	1	0	0	0	0	0	0	0	0	1	0	0
'BPRS Somatic concern'	0	0	0	0	0	0	0	0	6	0	0	0	0	0	0	1	6	0	0	0	0	0	0	0	0	0	2	0	1	0	0	1	0	0	0	0	0	0	0	0	1	0	0	2	0	0	0	0	0
'BPRS Suicidality'	0	0	0	0	0	1	0	0	4	0	0	1	0	0	0	0	1	0	0	3	1	0	0	0	0	0	0	2	0	0	0	0	0	0	0	0	0	0	0	0	0	0	0	3	0	0	0	0	0
'BPRS Suspiciousness'	0	6	0	0	2	0	0	1	0	1	0	1	0	0	0	1	0	0	0	1	0	0	0	0	0	0	4	9	0	0	0	4	0	0	0	0	1	1	0	0	0	0	0	0	0	0	0	0	0
'BPRS Tension'	0	0	0	0	0	0	0	0	0	0	0	0	0	0	0	0	2	0	1	0	7	2	0	6	5	0	0	6	7	4	0	0	0	0	0	0	2	3	0	0	0	0	0	0	0	0	0	0	0
'BPRS Uncooperativeness'	0	0	0	0	0	0	0	0	4	0	0	0	0	0	2	0	0	0	2	0	3	1	0	0	0	0	0	10	7	0	0	0	0	0	1	2	0	0	0	0	0	0	0	2	0	0	0	0	3
'BPRS Unusual thought content'	3	0	0	0	0	4	0	0	0	0	0	0	0	0	0	0	9	0	0	2	0	0	0	2	0	0	2	0	0	0	3	1	0	0	1	3	0	0	3	0	0	0	0	0	0	0	0	0	0
'1.1 Unusual thought content T2'	3	0	0	0	0	0	0	0	0	0	0	0	0	0	0	0	0	0	0	0	0	0	0	0	0	0	0	0	0	0	0	0	0	0	0	0	0	3	0	0	0	0	0	0	0	0	0	0	0
'1.2 Non-bizarre ideas T2'	0	10	0	0	0	0	0	0	0	0	0	0	0	0	0	0	0	0	0	0	0	0	0	0	0	0	0	0	0	0	0	0	0	0	0	0	0	0	0	0	4	1	1	1	3	1	0	0	0
'1.3 Perceptual abnormalities T2'	0	0	0	0	0	0	0	0	0	0	0	0	1	0	0	0	0	0	0	0	0	0	0	0	0	0	0	0	0	0	0	0	1	0	0	0	0	0	0	4	0	0	0	2	0	0	0	0	0
'1.4 Disorganized speech T2'	0	0	0	0	0	0	0	0	1	0	0	0	0	0	0	0	1	0	0	0	0	0	0	0	0	0	0	0	0	0	0	0	0	0	0	0	0	0	0	1	0	0	0	3	1	0	1	0	0
'4.3 Anhedonia T2'	0	0	0	0	0	0	0	0	0	0	0	0	0	2	0	0	0	0	0	0	0	0	0	0	0	0	0	0	0	0	0	0	0	0	0	0	0	0	0	1	0	0	0	5	0	0	0	0	0
'4.2 Avolition/apathy T2'	0	0	0	0	5	15	0	6	4	4	0	0	1	0	3	0	0	0	0	0	0	0	0	0	0	0	0	0	0	0	0	0	2	3	0	0	2	0	0	1	2	3	5	0	0	2	0	1	0
'3.2 Blunted affect T2'	0	0	0	0	0	0	2	0	0	0	0	0	0	0	0	0	0	2	0	0	0	0	0	2	0	0	0	0	0	0	2	0	0	0	0	0	0	0	0	3	0	1	0	0	0	1	9	0	0
'3.1 Subjective emotional disturbance T2'	0	0	0	0	0	0	0	0	0	0	0	0	0	0	0	0	0	0	0	0	0	0	0	0	0	0	0	0	0	0	0	0	0	0	0	0	0	0	0	1	0	0	0	2	1	0	0	0	1
'2.2 Objective cognitive change T2'	0	0	0	0	0	0	0	0	10	0	0	0	0	0	2	1	0	0	0	0	0	0	0	0	0	0	0	0	0	0	0	1	0	0	0	0	0	0	0	0	0	1	0	0	9	0	0	2	3
'5.2 Impaired role functioning T2'	0	0	0	0	4	8	0	2	0	4	0	0	0	0	0	0	0	0	0	0	0	0	0	0	0	3	0	0	0	0	0	0	0	0	0	0	0	0	0	0	0	0	0	1	0	0	2	0	2
'5.3 Disorganized behavior T2'	0	0	0	0	0	0	0	0	0	0	0	0	0	0	1	0	1	0	0	0	0	0	0	0	0	0	0	0	0	0	0	0	0	0	0	0	3	0	0	0	0	0	0	0	0	1	3	2	0
'7.2 Depression T2'	0	0	0	0	0	0	0	0	0	0	0	0	0	0	0	0	0	0	0	2	0	0	0	0	0	2	0	0	0	0	0	0	0	0	0	0	0	0	0	1	2	0	0	2	0	0	0	0	0
'6.1 Subjective motor functioning T2'	0	0	0	0	0	0	0	0	0	0	0	0	0	0	0	0	0	0	0	0	0	0	0	0	0	0	0	0	0	0	0	0	0	0	0	0	0	0	0	0	1	0	0	16	0	0	0	0	0
'7.8 Impaired subjective tolerance to normal stress T2'	0	0	0	0	0	0	1	0	0	0	0	0	0	2	0	0	0	2	1	0	0	0	0	1	0	5	0	0	0	0	1	0	0	0	0	0	0	1	1	1	1	0	3	2	1	0	0	0	1
'2.1 Subjective cognitive change T2'	0	0	0	3	0	0	0	0	5	0	0	0	4	0	2	1	0	0	0	0	0	0	0	0	0	0	0	0	0	0	0	0	0	0	0	0	0	0	0	3	5	8	4	16	6	3	3	1	0
'BPRS Anxiety T2'	0	0	0	0	2	6	0	1	1	1	0	0	0	0	1	9	0	0	0	0	0	0	0	0	0	0	0	7	0	0	0	7	3	0	2	5	0	0	0	4	0	1	1	2	0	0	5	3	2
'BPRS Bizarre behaviour T2'	0	0	0	3	0	0	0	0	0	0	3	0	0	0	0	0	21	0	3	0	0	0	0	0	0	0	0	0	0	0	0	0	0	0	0	0	0	0	0	0	0	1	0	0	1	0	4	5	7
'BPRS Blunted affect T2'	0	0	0	0	3	7	9	0	0	0	0	0	0	0	0	0	3	9	0	1	0	1	0	5	0	0	0	0	0	0	9	0	0	0	0	0	0	0	0	0	0	1	1	2	4	1	0	1	2
'BPRS Conceptual disorganisation T2'	0	0	0	0	0	0	0	0	1	0	1	0	0	0	0	2	12	0	8	0	0	0	0	0	4	0	0	7	0	5	0	0	0	2	0	0	0	0	3	7	0	3	0	0	0	0	0	0	0
'BPRS Depression T2'	0	0	0	0	2	3	0	1	2	1	0	1	0	6	0	2	0	0	0	8	0	0	0	0	0	0	0	0	0	0	0	0	0	2	0	0	2	0	2	3	1	0	3	4	3	3	0	2	0
'BPRS Disorientation T2'	0	0	0	0	0	0	0	0	0	0	0	0	0	0	0	0	0	0	0	0	52	0	0	0	0	0	0	0	0	0	0	0	0	0	0	0	0	0	0	0	0	0	0	0	0	0	0	0	0
'BPRS Distractibility T2'	0	0	0	0	0	0	0	0	0	0	0	0	0	0	0	0	0	0	0	0	0	1	0	0	0	0	0	0	0	0	0	0	0	0	0	0	0	0	0	0	0	0	0	0	0	0	24	0	0
'BPRS Elated Mood T2'	0	0	0	0	0	0	0	0	0	0	0	0	0	0	0	0	12	0	0	0	0	0	0	0	0	0	0	0	0	0	0	0	0	0	10	0	0	0	0	0	0	0	0	0	0	0	0	0	0
'BPRS Emotional withdrawal T2'	0	0	0	0	2	7	3	1	2	0	0	0	0	0	0	0	6	6	1	0	0	1	0	8	6	0	0	0	0	0	0	0	3	3	0	0	3	0	0	0	0	0	3	5	6	3	0	2	1
'BPRS Excitement T2'	0	0	0	0	0	0	0	0	3	0	0	0	0	0	3	0	7	0	9	0	0	0	0	0	17	0	0	7	0	9	0	0	0	6	0	2	2	0	0	0	0	0	0	2	0	0	0	0	0
'BPRS Guilt T2'	0	0	0	0	5	4	0	0	0	0	0	0	0	2	0	1	3	0	2	3	4	1	0	2	3	2	0	8	0	0	0	0	0	2	0	1	3	0	0	3	0	1	1	2	4	1	0	1	0
'BPRS Hallucinations T2'	0	0	0	0	0	0	0	0	1	0	0	0	0	0	0	0	0	0	3	0	0	1	0	0	0	0	0	9	0	0	0	3	0	1	0	0	2	0	0	3	10	0	0	7	0	1	1	0	1
'BPRS Hostility T2'	0	0	0	0	0	1	0	0	1	0	0	2	3	1	5	0	0	0	0	3	0	0	0	0	0	0	0	18	0	0	0	1	0	1	10	0	0	0	0	1	0	0	0	3	0	0	1	0	0
'BPRS Mannerisms T2'	0	0	9	0	0	0	0	0	0	0	0	0	0	0	0	0	0	0	0	0	0	0	0	0	0	0	0	0	0	0	0	0	0	0	0	0	0	0	0	0	0	0	0	0	0	0	0	0	0
'BPRS Motor hyperactivity T2'	0	0	0	0	0	0	0	0	14	0	0	0	0	0	0	0	0	0	0	0	0	3	0	0	0	0	0	0	0	3	0	0	0	0	0	0	0	0	0	0	0	0	0	0	0	0	4	0	0
'BPRS Motor retardation T2'	0	0	0	0	0	0	0	0	0	0	0	0	0	0	0	0	0	0	0	0	0	0	0	11	0	0	0	0	0	0	16	0	0	0	0	0	0	0	0	1	0	0	0	13	3	3	0	0	0
'BPRS Self neglect T2'	0	0	0	0	1	5	0	0	2	1	18	3	0	0	1	0	0	0	0	0	2	0	0	0	0	0	0	4	0	0	0	12	0	1	0	0	1	0	0	1	0	0	0	13	0	0	3	3	2
'BPRS Somatic concern T2'	0	0	0	0	0	0	0	0	0	0	0	0	8	0	0	1	0	0	0	0	0	0	0	0	0	0	0	0	0	0	0	0	8	0	0	4	0	0	0	0	1	0	1	17	0	0	0	0	0
'BPRS Suicidality T2'	0	0	0	0	1	4	0	0	0	0	0	2	0	2	1	0	0	0	1	3	0	0	0	1	0	1	0	8	0	0	0	0	0	2	0	0	0	0	0	1	0	1	3	5	0	5	0	0	0
'BPRS Suspiciousness T2'	0	0	0	0	2	7	0	0	2	0	2	3	0	0	1	0	0	0	0	2	0	0	0	0	0	0	0	5	0	0	0	3	0	1	1	0	0	0	0	7	1	0	0	2	0	1	0	1	5
'BPRS Tension T2'	0	7	0	0	0	0	0	8	1	0	0	0	0	0	3	5	0	0	0	3	3	0	0	0	7	0	0	2	0	0	0	5	0	0	5	21	0	0	0	3	0	0	6	4	0	0	0	20	0
'BPRS Uncooperativeness T2'	0	0	0	0	0	0	0	0	0	11	0	0	0	0	0	0	0	0	0	0	1	0	0	0	0	0	0	0	0	0	0	0	0	0	0	0	14	0	8	0	0	0	0	0	0	0	0	0	0
'BPRS Unusual thought content T2'	0	0	0	0	0	0	0	0	6	1	0	0	0	0	0	1	0	0	0	0	4	0	0	0	3	0	0	5	0	0	0	2	0	1	0	0	2	0	22	12	0	2	0	0	0	0	0	5	0
[truncated: 27 more columns]
